# Supplementary material for: Diverse reactivity of nitrones towards electron deficient acetylenes
Source: Royal Society of Chemistry journal article supplement (doi:10.1039/c5nj00742a), 2015-01-01

## Supporting Information

### Diverse Reactivity of Nitrones with Electron Deficient Acetylenes

Sandhya Radhamani,<sup>a</sup> Rakesh Natarajan,<sup>a</sup> Peruparampil A. Unnikrishnan,<sup>a</sup> Sreedharan Prathapan\*<sup>a</sup> and John P. Rappai\*<sup>b</sup>

<sup>a</sup>*Department of Applied Chemistry, Cochin University of Science and Technology, Kochi-682022, India*

<sup>b</sup>*Department of Chemistry, Government Victoria College, Palakkad-678001, India*

prathapans@gmail.com, johnnedumpal@yahoo.co.in

#### Table of Contents

|                                                                                    | Pages |
|------------------------------------------------------------------------------------|-------|
| 1. Alternate mechanism for reactions reported in References 2f and 13              | 3     |
| 2. Crystal data and structure refinement of compound <b>15</b>                     | 5     |
| 3. Crystal data and structure refinement of compound <b>17</b>                     | 13    |
| 4. Crystal data and structure refinement of compound <b>22</b>                     | 19    |
| 5. Crystal data and structure refinement of compound <b>32</b>                     | 27    |
| 6. Crystal data and structure refinement of compound <b>36</b>                     | 33    |
| 7. Copies of <sup>1</sup> H and <sup>13</sup> C NMR spectra for reported compounds | 39    |
| <sup>1</sup> H and <sup>13</sup> C NMR spectra for compound <b>6b</b>              | 39    |

|                                                                                                              |           |
|--------------------------------------------------------------------------------------------------------------|-----------|
| <sup>1</sup> H and <sup>13</sup> C NMR spectra for compound <b>10</b>                                        | <b>41</b> |
| <sup>1</sup> H and <sup>13</sup> C NMR spectra for compound <b>13a</b>                                       | <b>43</b> |
| <sup>1</sup> H and <sup>13</sup> C NMR spectra for compound <b>13b</b>                                       | <b>45</b> |
| <sup>1</sup> H and <sup>13</sup> C NMR spectra for compound <b>15</b>                                        | <b>47</b> |
| <sup>1</sup> H and <sup>13</sup> C NMR spectra for compound <b>17</b>                                        | <b>49</b> |
| <sup>1</sup> H and <sup>13</sup> C NMR spectra for compound <b>22</b>                                        | <b>51</b> |
| <sup>1</sup> H and <sup>13</sup> C NMR spectra for compound <b>25</b>                                        | <b>53</b> |
| <sup>1</sup> H and <sup>13</sup> C NMR spectra for compound <b>26</b>                                        | <b>55</b> |
| <sup>1</sup> H and <sup>13</sup> C NMR spectra for compound <b>28</b>                                        | <b>57</b> |
| <sup>1</sup> H and <sup>13</sup> C NMR spectra for compound <b>32</b>                                        | <b>60</b> |
| <sup>1</sup> H and <sup>13</sup> C NMR spectra for compound <b>35</b>                                        | <b>62</b> |
| <sup>1</sup> H and <sup>13</sup> C NMR spectra for compound <b>36</b>                                        | <b>64</b> |
| <sup>1</sup> H and <sup>13</sup> C NMR spectra for compound <b>39</b>                                        | <b>66</b> |
| Reaction between <i>N</i> -(9 <i>H</i> -fluoren-9-ylidene)-2,6-difluoroaniline oxide<br>( <b>C</b> ) and DBA | <b>69</b> |
| <sup>1</sup> H and <sup>13</sup> C NMR spectra for compound <b>D</b>                                         | <b>70</b> |

**1a. i) Reported mechanism for the reaction between (*E*)-*N*-((*E*)-1,3-diphenylallylidene)aniline oxide and methyl buta-2,3-dienoate<sup>2f</sup>**

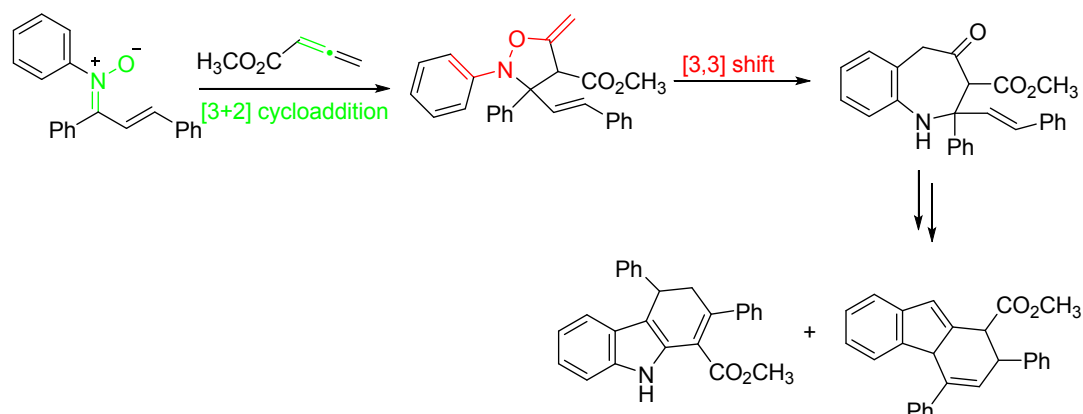

**1a. ii) Alternate mechanism involving zwitterionic intermediate**

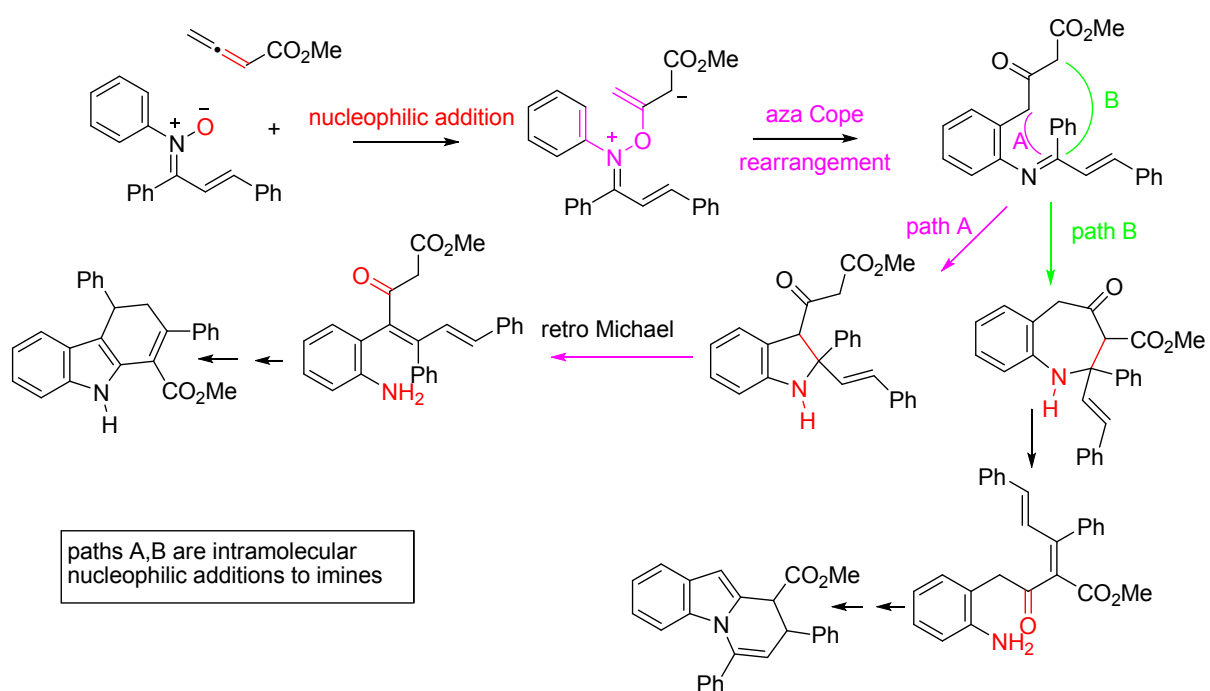

1b. i) Reported mechanism for the reaction between (*E*)-*N*-(1,4-dimethoxy-1,4-dioxobutan-2-ylidene)methanamine oxide and methyl propiolate<sup>13</sup>

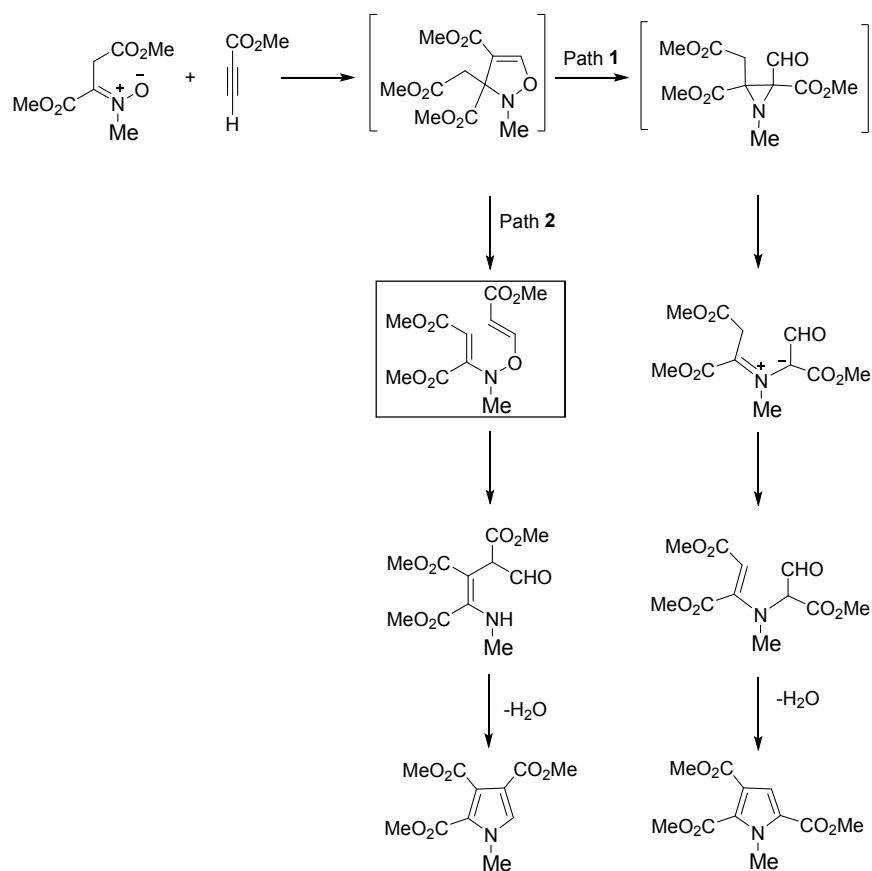

1b. ii) Alternate mechanism involving zwitterionic intermediate

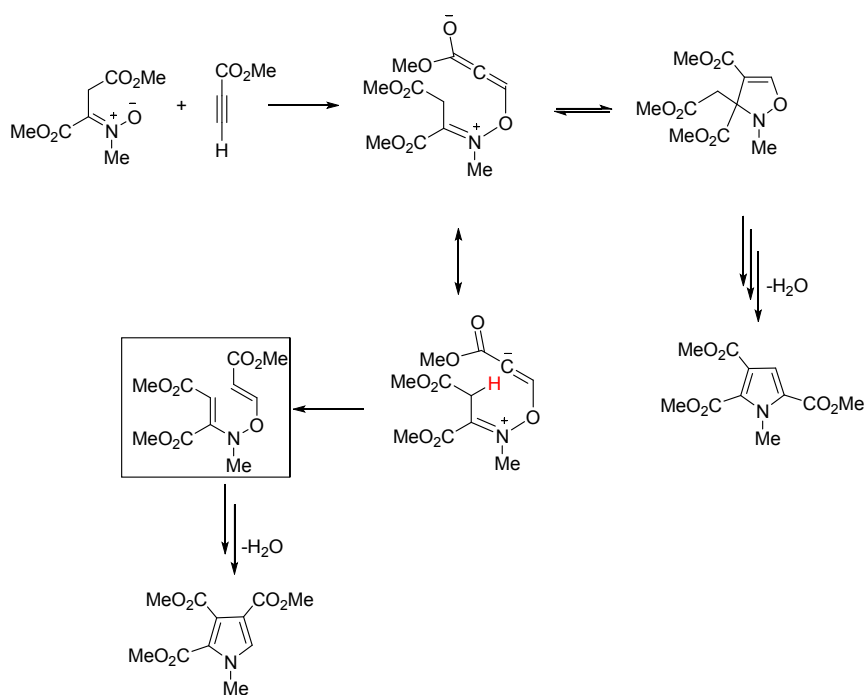

## 1. Crystal data and structure refinement of compound **15**

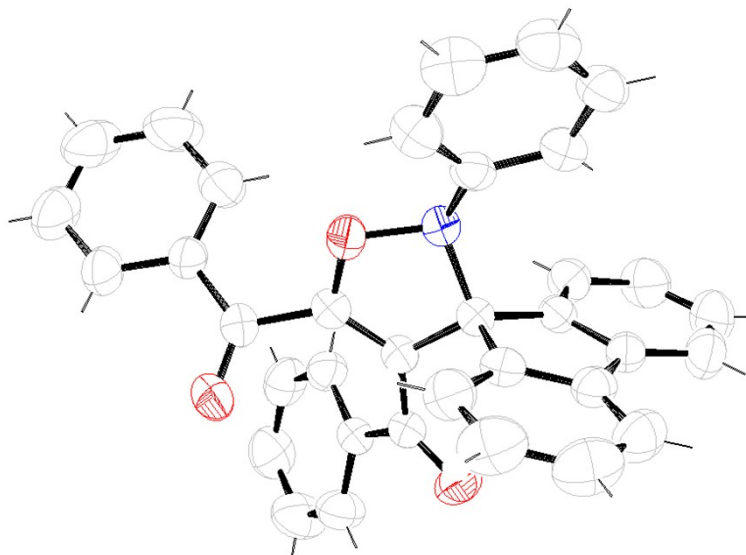

Table 1. Crystal data and structure refinement for Compound **15**.

|                             |                                                                                                                         |
|-----------------------------|-------------------------------------------------------------------------------------------------------------------------|
| Identification code         | <b>15</b>                                                                                                               |
| Empirical formula           | C <sub>35</sub> H <sub>23</sub> N O <sub>3</sub>                                                                        |
| Formula weight              | 505.54                                                                                                                  |
| Temperature                 | 296(2) K                                                                                                                |
| Wavelength                  | 0.71073 Å                                                                                                               |
| Crystal system, space group | Monoclinic, P12(1)/c1                                                                                                   |
| Unit cell dimensions        | a = 9.9946(4) Å    alpha = 90 deg.<br>b = 20.4122(9) Å    beta = 102.181(2) deg.<br>c = 13.4281(5) Å    gamma = 90 deg. |
| Volume                      | 2677.81(19) Å <sup>3</sup>                                                                                              |
| Z, Calculated density       | 4, 1.254 Mg/m <sup>3</sup>                                                                                              |

Absorption coefficient      0.080 mm<sup>-1</sup>  
 F(000)                      1056  
 Crystal size                 0.30 x 0.25 x 0.20 mm  
 Theta range for data collection 1.84 to 28.24 deg.  
 Limiting indices            -13<=h<=11, -11<=k<=27, -16<=l<=17  
 Reflections collected / unique 15195 / 6417 [R(int) = 0.0256]  
 Completeness to theta = 28.24 96.9 %  
 Max. and min. transmission 0.9842 and 0.9765  
 Refinement method         Full-matrix least-squares on F<sup>2</sup>  
 Data / restraints / parameters 6417 / 0 / 352  
 Goodness-of-fit on F<sup>2</sup>      1.002  
 Final R indices [I>2sigma(I)] R1 = 0.0473, wR2 = 0.1222  
 R indices (all data)        R1 = 0.0922, wR2 = 0.1541  
 Largest diff. peak and hole 0.188 and -0.220 e.A<sup>-3</sup>

Table 2. Bond lengths [Å] and angles [deg] for Compound **15**.

|            |            |
|------------|------------|
| O(1)-C(7)  | 1.3517(19) |
| O(1)-N(1)  | 1.4763(17) |
| O(2)-C(25) | 1.2250(18) |
| O(3)-C(8)  | 1.218(2)   |
| N(1)-C(16) | 1.428(2)   |
| N(1)-C(5)  | 1.511(2)   |
| C(1)-C(2)  | 1.364(3)   |
| C(1)-C(17) | 1.384(3)   |
| C(1)-H(1)  | 0.9300     |

|             |          |
|-------------|----------|
| C(2)-C(3)   | 1.387(3) |
| C(2)-H(2)   | 0.9300   |
| C(3)-C(4)   | 1.380(2) |
| C(3)-H(3)   | 0.9300   |
| C(4)-C(18)  | 1.389(2) |
| C(4)-C(5)   | 1.524(2) |
| C(5)-C(24)  | 1.515(2) |
| C(5)-C(6)   | 1.517(2) |
| C(6)-C(7)   | 1.337(2) |
| C(6)-C(25)  | 1.475(2) |
| C(7)-C(8)   | 1.502(2) |
| C(8)-C(9)   | 1.471(2) |
| C(9)-C(32)  | 1.384(3) |
| C(9)-C(10)  | 1.385(2) |
| C(10)-C(11) | 1.373(3) |
| C(10)-H(10) | 0.9300   |
| C(11)-C(12) | 1.360(3) |
| C(11)-H(11) | 0.9300   |
| C(12)-C(33) | 1.372(3) |
| C(12)-H(12) | 0.9300   |
| C(13)-C(14) | 1.363(3) |
| C(13)-C(35) | 1.374(3) |
| C(13)-H(13) | 0.9300   |
| C(14)-C(15) | 1.394(3) |
| C(14)-H(14) | 0.9300   |
| C(15)-C(16) | 1.379(2) |
| C(15)-H(15) | 0.9300   |
| C(16)-C(34) | 1.384(2) |
| C(17)-C(18) | 1.386(2) |

|             |          |
|-------------|----------|
| C(17)-H(17) | 0.9300   |
| C(18)-C(19) | 1.471(2) |
| C(19)-C(20) | 1.380(2) |
| C(19)-C(24) | 1.397(2) |
| C(20)-C(21) | 1.374(3) |
| C(20)-H(20) | 0.9300   |
| C(21)-C(22) | 1.379(3) |
| C(21)-H(21) | 0.9300   |
| C(22)-C(23) | 1.377(3) |
| C(22)-H(22) | 0.9300   |
| C(23)-C(24) | 1.380(2) |
| C(23)-H(23) | 0.9300   |
| C(25)-C(26) | 1.489(2) |
| C(26)-C(31) | 1.382(2) |
| C(26)-C(27) | 1.387(2) |
| C(27)-C(28) | 1.382(3) |
| C(27)-H(27) | 0.9300   |
| C(28)-C(29) | 1.359(3) |
| C(28)-H(28) | 0.9300   |
| C(29)-C(30) | 1.368(3) |
| C(29)-H(29) | 0.9300   |
| C(30)-C(31) | 1.369(3) |
| C(30)-H(30) | 0.9300   |
| C(31)-H(31) | 0.9300   |
| C(32)-C(33) | 1.378(3) |
| C(32)-H(32) | 0.9300   |
| C(33)-H(33) | 0.9300   |
| C(34)-C(35) | 1.383(3) |
| C(34)-H(34) | 0.9300   |



|                 |            |
|-----------------|------------|
| C(35)-H(35)     | 0.9300     |
| C(7)-O(1)-N(1)  | 104.03(11) |
| C(16)-N(1)-O(1) | 108.61(12) |
| C(16)-N(1)-C(5) | 118.81(12) |
| O(1)-N(1)-C(5)  | 104.48(11) |
| C(2)-C(1)-C(17) | 121.74(19) |
| C(2)-C(1)-H(1)  | 119.1      |
| C(17)-C(1)-H(1) | 119.1      |
| C(1)-C(2)-C(3)  | 120.73(19) |
| C(1)-C(2)-H(2)  | 119.6      |
| C(3)-C(2)-H(2)  | 119.6      |
| C(4)-C(3)-C(2)  | 118.12(19) |
| C(4)-C(3)-H(3)  | 120.9      |
| C(2)-C(3)-H(3)  | 120.9      |
| C(3)-C(4)-C(18) | 121.21(16) |
| C(3)-C(4)-C(5)  | 128.75(16) |
| C(18)-C(4)-C(5) | 110.04(14) |
| N(1)-C(5)-C(24) | 110.15(12) |
| N(1)-C(5)-C(6)  | 98.63(12)  |
| C(24)-C(5)-C(6) | 116.75(13) |
| N(1)-C(5)-C(4)  | 115.72(13) |
| C(24)-C(5)-C(4) | 102.24(12) |
| C(6)-C(5)-C(4)  | 114.00(12) |
| C(7)-C(6)-C(25) | 129.64(16) |
| C(7)-C(6)-C(5)  | 107.57(14) |
| C(25)-C(6)-C(5) | 122.62(14) |
| C(6)-C(7)-O(1)  | 114.20(15) |
| C(6)-C(7)-C(8)  | 130.80(16) |
| O(1)-C(7)-C(8)  | 114.75(14) |

|                   |            |
|-------------------|------------|
| O(3)-C(8)-C(9)    | 122.55(17) |
| O(3)-C(8)-C(7)    | 117.45(15) |
| C(9)-C(8)-C(7)    | 119.98(15) |
| C(32)-C(9)-C(10)  | 119.14(17) |
| C(32)-C(9)-C(8)   | 122.23(17) |
| C(10)-C(9)-C(8)   | 118.59(16) |
| C(11)-C(10)-C(9)  | 120.5(2)   |
| C(11)-C(10)-H(10) | 119.7      |
| C(9)-C(10)-H(10)  | 119.7      |
| C(12)-C(11)-C(10) | 119.9(2)   |
| C(12)-C(11)-H(11) | 120.0      |
| C(10)-C(11)-H(11) | 120.0      |
| C(11)-C(12)-C(33) | 120.5(2)   |
| C(11)-C(12)-H(12) | 119.7      |
| C(33)-C(12)-H(12) | 119.7      |
| C(14)-C(13)-C(35) | 119.51(19) |
| C(14)-C(13)-H(13) | 120.2      |
| C(35)-C(13)-H(13) | 120.2      |
| C(13)-C(14)-C(15) | 121.0(2)   |
| C(13)-C(14)-H(14) | 119.5      |
| C(15)-C(14)-H(14) | 119.5      |
| C(16)-C(15)-C(14) | 119.30(19) |
| C(16)-C(15)-H(15) | 120.4      |
| C(14)-C(15)-H(15) | 120.4      |
| C(15)-C(16)-C(34) | 119.66(17) |
| C(15)-C(16)-N(1)  | 122.83(16) |
| C(34)-C(16)-N(1)  | 117.29(15) |
| C(1)-C(17)-C(18)  | 118.0(2)   |
| C(1)-C(17)-H(17)  | 121.0      |

|                   |            |
|-------------------|------------|
| C(18)-C(17)-H(17) | 121.0      |
| C(17)-C(18)-C(4)  | 120.18(16) |
| C(17)-C(18)-C(19) | 130.86(17) |
| C(4)-C(18)-C(19)  | 108.95(14) |
| C(20)-C(19)-C(24) | 119.74(16) |
| C(20)-C(19)-C(18) | 131.70(16) |
| C(24)-C(19)-C(18) | 108.55(14) |
| C(21)-C(20)-C(19) | 118.76(18) |
| C(21)-C(20)-H(20) | 120.6      |
| C(19)-C(20)-H(20) | 120.6      |
| C(20)-C(21)-C(22) | 121.38(19) |
| C(20)-C(21)-H(21) | 119.3      |
| C(22)-C(21)-H(21) | 119.3      |
| C(23)-C(22)-C(21) | 120.55(18) |
| C(23)-C(22)-H(22) | 119.7      |
| C(21)-C(22)-H(22) | 119.7      |
| C(22)-C(23)-C(24) | 118.42(17) |
| C(22)-C(23)-H(23) | 120.8      |
| C(24)-C(23)-H(23) | 120.8      |
| C(23)-C(24)-C(19) | 121.13(16) |
| C(23)-C(24)-C(5)  | 128.68(15) |
| C(19)-C(24)-C(5)  | 110.18(13) |
| O(2)-C(25)-C(6)   | 119.43(15) |
| O(2)-C(25)-C(26)  | 120.90(15) |
| C(6)-C(25)-C(26)  | 119.63(13) |
| C(31)-C(26)-C(27) | 118.29(16) |
| C(31)-C(26)-C(25) | 118.96(15) |
| C(27)-C(26)-C(25) | 122.70(15) |
| C(28)-C(27)-C(26) | 120.11(18) |

|                   |            |
|-------------------|------------|
| C(28)-C(27)-H(27) | 119.9      |
| C(26)-C(27)-H(27) | 119.9      |
| C(29)-C(28)-C(27) | 120.55(18) |
| C(29)-C(28)-H(28) | 119.7      |
| C(27)-C(28)-H(28) | 119.7      |
| C(28)-C(29)-C(30) | 119.9(2)   |
| C(28)-C(29)-H(29) | 120.1      |
| C(30)-C(29)-H(29) | 120.1      |
| C(29)-C(30)-C(31) | 120.3(2)   |
| C(29)-C(30)-H(30) | 119.9      |
| C(31)-C(30)-H(30) | 119.9      |
| C(30)-C(31)-C(26) | 120.87(18) |
| C(30)-C(31)-H(31) | 119.6      |
| C(26)-C(31)-H(31) | 119.6      |
| C(9)-C(32)-C(33)  | 119.7(2)   |
| C(9)-C(32)-H(32)  | 120.2      |
| C(33)-C(32)-H(32) | 120.2      |
| C(12)-C(33)-C(32) | 120.2(2)   |
| C(12)-C(33)-H(33) | 119.9      |
| C(32)-C(33)-H(33) | 119.9      |
| C(16)-C(34)-C(35) | 120.05(18) |
| C(16)-C(34)-H(34) | 120.0      |
| C(35)-C(34)-H(34) | 120.0      |
| C(13)-C(35)-C(34) | 120.4(2)   |
| C(13)-C(35)-H(35) | 119.8      |
| C(34)-C(35)-H(35) | 119.8      |

---

Symmetry transformations used to generate equivalent atoms:

## 2. ORTEP Diagram of Compound 17

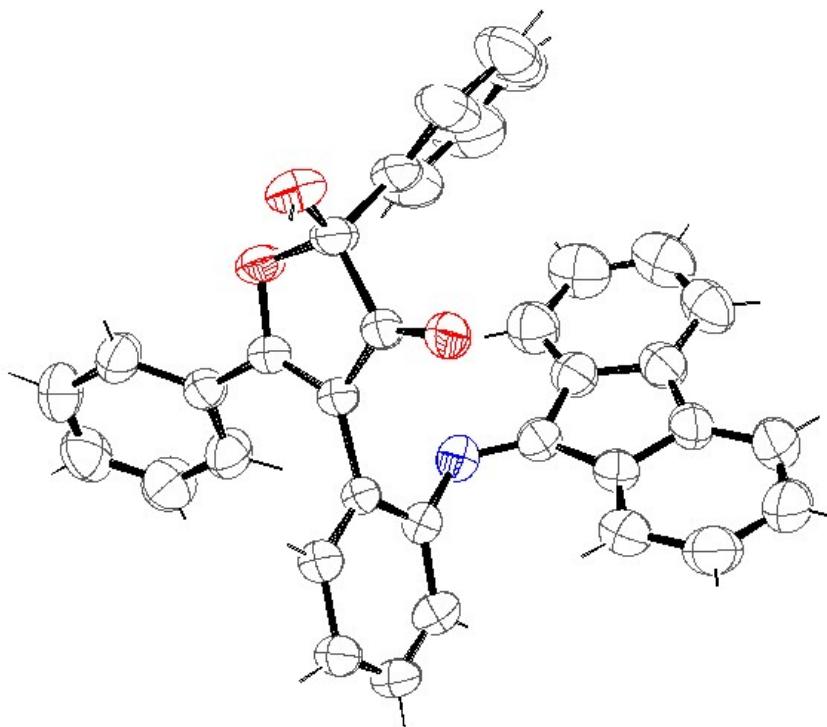

Table 1. Crystal data and structure refinement for compound **17**.

|                             |                                                                                                                                       |
|-----------------------------|---------------------------------------------------------------------------------------------------------------------------------------|
| Identification code         | compound <b>17</b>                                                                                                                    |
| Empirical formula           | C <sub>35</sub> H <sub>23</sub> N O <sub>3</sub>                                                                                      |
| Formula weight              | 505.67                                                                                                                                |
| Temperature                 | 100(2) K                                                                                                                              |
| Wavelength                  | 0.71073 Å                                                                                                                             |
| Crystal system, space group | Triclinic, P -1                                                                                                                       |
| Unit cell dimensions        | a = 10.992(2) Å    alpha = 109.668(2) deg.<br>b = 11.411(3) Å    beta = 106.721(4) deg.<br>c = 13.062(3) Å    gamma = 104.309(3) deg. |
| Volume                      | 1365.6(5) Å <sup>3</sup>                                                                                                              |
| Z, Calculated density       | 2, 1.230 Mg/m <sup>3</sup>                                                                                                            |
| Absorption coefficient      | 0.078 mm <sup>-1</sup>                                                                                                                |
| F(000)                      | 528                                                                                                                                   |
| Crystal size                | 0.50 x 0.45 x 0.30 mm                                                                                                                 |

Theta range for data collection 1.81 to 26.02 deg.  
 Limiting indices  $-13 \leq h \leq 13$ ,  $-14 \leq k \leq 14$ ,  $-16 \leq l \leq 16$   
 Reflections collected / unique 14311 / 5348 [R(int) = 0.0322]  
 Completeness to theta = 26.00 99.5 %  
 Absorption correction Semi-empirical from equivalents  
 Max. and min. transmission 0.9704 and 0.9551  
 Refinement method Full-matrix least-squares on F<sup>2</sup>  
 Data / restraints / parameters 5348 / 0 / 462  
 Goodness-of-fit on F<sup>2</sup> 1.024  
 Final R indices [I > 2sigma(I)] R1 = 0.0447, wR2 = 0.0986  
 R indices (all data) R1 = 0.0802, wR2 = 0.1099  
 Extinction coefficient 0.0044(13)  
 Largest diff. peak and hole 0.177 and -0.141 e.A<sup>-3</sup>

Table 2. Bond lengths [Å] and angles [deg] for compound **17**.

---

|             |            |
|-------------|------------|
| O(1)-C(21)  | 1.2276(17) |
| O(2)-C(23)  | 1.3584(17) |
| O(2)-C(22)  | 1.4637(18) |
| O(3)-C(22)  | 1.3742(19) |
| N(1)-C(13)  | 1.277(2)   |
| N(1)-C(14)  | 1.416(2)   |
| C(21)-C(20) | 1.424(2)   |
| C(21)-C(22) | 1.541(2)   |
| C(18)-C(19) | 1.387(2)   |
| C(18)-C(17) | 1.392(2)   |
| C(19)-C(14) | 1.390(2)   |
| C(19)-C(20) | 1.489(2)   |
| C(20)-C(23) | 1.363(2)   |

|             |          |
|-------------|----------|
| C(14)-C(15) | 1.386(2) |
| C(30)-C(31) | 1.361(3) |
| C(30)-C(35) | 1.371(3) |
| C(30)-C(22) | 1.509(2) |
| C(24)-C(25) | 1.386(2) |
| C(24)-C(29) | 1.386(2) |
| C(24)-C(23) | 1.458(2) |
| C(15)-C(16) | 1.375(3) |
| C(17)-C(16) | 1.382(3) |
| C(13)-C(1)  | 1.480(2) |
| C(13)-C(12) | 1.489(2) |
| C(12)-C(11) | 1.387(2) |
| C(12)-C(7)  | 1.401(2) |
| C(25)-C(26) | 1.382(3) |
| C(1)-C(2)   | 1.381(3) |
| C(1)-C(6)   | 1.391(2) |
| C(7)-C(8)   | 1.380(3) |
| C(7)-C(6)   | 1.473(3) |
| C(29)-C(28) | 1.383(3) |
| C(6)-C(5)   | 1.388(3) |
| C(8)-C(9)   | 1.373(3) |
| C(10)-C(9)  | 1.378(3) |
| C(10)-C(11) | 1.391(3) |
| C(28)-C(27) | 1.361(3) |
| C(27)-C(26) | 1.366(3) |
| C(5)-C(4)   | 1.382(3) |
| C(35)-C(34) | 1.371(3) |
| C(2)-C(3)   | 1.390(3) |
| C(3)-C(4)   | 1.372(3) |

|                   |            |
|-------------------|------------|
| C(31)-C(32)       | 1.385(4)   |
| C(33)-C(34)       | 1.345(4)   |
| C(33)-C(32)       | 1.360(4)   |
| C(23)-O(2)-C(22)  | 108.20(10) |
| C(13)-N(1)-C(14)  | 120.61(14) |
| O(1)-C(21)-C(20)  | 130.52(13) |
| O(1)-C(21)-C(22)  | 122.09(13) |
| C(20)-C(21)-C(22) | 107.39(12) |
| C(19)-C(18)-C(17) | 121.94(17) |
| C(18)-C(19)-C(14) | 119.19(14) |
| C(18)-C(19)-C(20) | 120.84(14) |
| C(14)-C(19)-C(20) | 119.96(13) |
| C(23)-C(20)-C(21) | 106.83(13) |
| C(23)-C(20)-C(19) | 126.55(13) |
| C(21)-C(20)-C(19) | 126.55(13) |
| C(15)-C(14)-C(19) | 119.22(16) |
| C(15)-C(14)-N(1)  | 121.90(16) |
| C(19)-C(14)-N(1)  | 118.52(13) |
| C(31)-C(30)-C(35) | 118.6(2)   |
| C(31)-C(30)-C(22) | 122.39(18) |
| C(35)-C(30)-C(22) | 118.87(17) |
| C(25)-C(24)-C(29) | 118.93(16) |
| C(25)-C(24)-C(23) | 120.97(15) |
| C(29)-C(24)-C(23) | 120.10(16) |
| O(2)-C(23)-C(20)  | 114.69(13) |
| O(2)-C(23)-C(24)  | 114.76(12) |
| C(20)-C(23)-C(24) | 130.54(14) |
| C(16)-C(15)-C(14) | 120.37(19) |
| C(16)-C(17)-C(18) | 117.37(17) |



|                   |            |
|-------------------|------------|
| O(3)-C(22)-O(2)   | 108.97(12) |
| O(3)-C(22)-C(30)  | 110.50(13) |
| O(2)-C(22)-C(30)  | 109.20(13) |
| O(3)-C(22)-C(21)  | 113.75(13) |
| O(2)-C(22)-C(21)  | 102.66(11) |
| C(30)-C(22)-C(21) | 111.39(13) |
| N(1)-C(13)-C(1)   | 121.28(15) |
| N(1)-C(13)-C(12)  | 133.08(16) |
| C(1)-C(13)-C(12)  | 105.63(14) |
| C(11)-C(12)-C(7)  | 119.63(17) |
| C(11)-C(12)-C(13) | 132.57(16) |
| C(7)-C(12)-C(13)  | 107.79(15) |
| C(26)-C(25)-C(24) | 120.02(19) |
| C(2)-C(1)-C(6)    | 121.09(18) |
| C(2)-C(1)-C(13)   | 129.67(17) |
| C(6)-C(1)-C(13)   | 109.23(16) |
| C(8)-C(7)-C(12)   | 120.96(19) |
| C(8)-C(7)-C(6)    | 129.83(18) |
| C(12)-C(7)-C(6)   | 109.21(15) |
| C(15)-C(16)-C(17) | 121.68(17) |
| C(28)-C(29)-C(24) | 120.1(2)   |
| C(5)-C(6)-C(1)    | 120.08(19) |
| C(5)-C(6)-C(7)    | 131.78(19) |
| C(1)-C(6)-C(7)    | 108.09(15) |
| C(9)-C(8)-C(7)    | 118.7(2)   |
| C(9)-C(10)-C(11)  | 120.6(2)   |
| C(27)-C(28)-C(29) | 120.4(2)   |
| C(12)-C(11)-C(10) | 118.8(2)   |
| C(28)-C(27)-C(26) | 120.2(2)   |

|                   |          |
|-------------------|----------|
| C(27)-C(26)-C(25) | 120.4(2) |
| C(4)-C(5)-C(6)    | 118.4(2) |
| C(30)-C(35)-C(34) | 121.2(3) |
| C(8)-C(9)-C(10)   | 121.3(2) |
| C(1)-C(2)-C(3)    | 118.4(2) |
| C(4)-C(3)-C(2)    | 120.5(2) |
| C(30)-C(31)-C(32) | 119.8(3) |
| C(3)-C(4)-C(5)    | 121.6(2) |
| C(34)-C(33)-C(32) | 119.8(3) |
| C(33)-C(34)-C(35) | 120.0(3) |
| C(33)-C(32)-C(31) | 120.6(3) |

---

Symmetry transformations used to generate equivalent atoms:

### 3. Crystal data and structure refinement of compound **22**

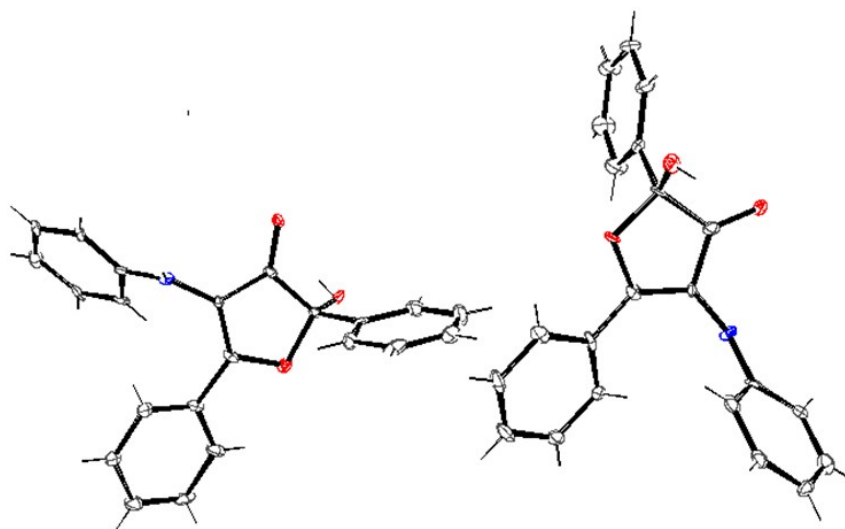

Table 1. Crystal data and structure refinement for Compound **22**

|                                 |                                                  |          |
|---------------------------------|--------------------------------------------------|----------|
| Identification code             | <b>22</b>                                        |          |
| Empirical formula               | C <sub>22</sub> H <sub>17</sub> N O <sub>3</sub> |          |
| Formula weight                  | 343.37                                           |          |
| Temperature                     | 100(2) K                                         |          |
| Wavelength                      | 0.71073 Å                                        |          |
| Crystal system                  | Orthorhombic                                     |          |
| Space group                     | Pna2 <sub>1</sub>                                |          |
| Unit cell dimensions            | a = 27.608(2) Å                                  | α = 90°. |
|                                 | b = 5.5963(5) Å                                  | β = 90°. |
|                                 | c = 21.6736(19) Å                                | γ = 90°. |
| Volume                          | 3348.6(5) Å <sup>3</sup>                         |          |
| Z                               | 8                                                |          |
| Density (calculated)            | 1.362 Mg/m <sup>3</sup>                          |          |
| Absorption coefficient          | 0.091 mm <sup>-1</sup>                           |          |
| F(000)                          | 1440                                             |          |
| Crystal size                    | 0.47 x 0.39 x 0.37 mm <sup>3</sup>               |          |
| Theta range for data collection | 2.95 to 25.00°.                                  |          |
| Index ranges                    | -32 ≤ h ≤ 32, -6 ≤ k ≤ 6, -25 ≤ l ≤ 24           |          |
| Reflections collected           | 93166                                            |          |
| Independent reflections         | 5857 [R(int) = 0.0755]                           |          |
| Completeness to theta = 25.00°  | 99.9 %                                           |          |

|                                   |                                             |
|-----------------------------------|---------------------------------------------|
| Absorption correction             | Semi-empirical from equivalents             |
| Max. and min. transmission        | 0.9671 and 0.9582                           |
| Refinement method                 | Full-matrix least-squares on F <sup>2</sup> |
| Data / restraints / parameters    | 5857 / 1 / 439                              |
| Goodness-of-fit on F <sup>2</sup> | 1.152                                       |
| Final R indices [I>2sigma(I)]     | R1 = 0.0902, wR2 = 0.2349                   |
| R indices (all data)              | R1 = 0.0925, wR2 = 0.2365                   |
| Absolute structure parameter      | -0.2(19)                                    |
| Largest diff. peak and hole       | 0.934 and -0.546 e.Å <sup>-3</sup>          |

Table 2. Bond lengths [Å] and angles [°] for Compound **22**.

---

|              |          |
|--------------|----------|
| O(1)-C(4)    | 1.363(6) |
| O(1)-C(1)    | 1.461(6) |
| O(2)-C(2)    | 1.211(6) |
| O(3)-C(1)    | 1.381(6) |
| O(3)-H(3A)   | 0.8400   |
| O(4)-C(26)   | 1.347(6) |
| O(4)-C(23)   | 1.484(6) |
| N(1)-C(3)    | 1.391(7) |
| N(1)-C(11)   | 1.410(7) |
| N(1)-H(1A)   | 0.8800   |
| C(1)-C(5)    | 1.510(7) |
| C(1)-C(2)    | 1.528(7) |
| C(2)-C(3)    | 1.444(7) |
| C(3)-C(4)    | 1.364(7) |
| C(4)-C(17)   | 1.466(7) |
| C(5)-C(10)   | 1.372(8) |
| C(5)-C(6)    | 1.393(8) |
| C(6)-C(7)    | 1.424(8) |
| C(6)-H(6A)   | 0.9500   |
| C(7)-C(8)    | 1.361(9) |
| C(7)-H(7A)   | 0.9500   |
| C(8)-C(9)    | 1.384(9) |
| C(8)-H(8A)   | 0.9500   |
| C(9)-C(10)   | 1.400(9) |
| C(9)-H(9A)   | 0.9500   |
| C(10)-H(10A) | 0.9500   |

|              |          |
|--------------|----------|
| C(11)-C(16)  | 1.366(8) |
| C(11)-C(12)  | 1.396(8) |
| C(12)-C(13)  | 1.388(8) |
| C(12)-H(12A) | 0.9500   |
| C(13)-C(14)  | 1.380(9) |
| C(13)-H(13A) | 0.9500   |
| C(14)-C(15)  | 1.368(8) |
| C(14)-H(14A) | 0.9500   |
| C(15)-C(16)  | 1.433(8) |
| C(15)-H(15A) | 0.9500   |
| C(16)-H(16A) | 0.9500   |
| C(17)-C(18)  | 1.389(8) |
| C(17)-C(22)  | 1.390(8) |
| C(18)-C(19)  | 1.380(7) |
| C(18)-H(18A) | 0.9500   |
| C(19)-C(20)  | 1.391(9) |
| C(19)-H(19A) | 0.9500   |
| C(20)-C(21)  | 1.378(9) |
| C(20)-H(20A) | 0.9500   |
| C(21)-C(22)  | 1.383(8) |
| C(21)-H(21A) | 0.9500   |
| C(22)-H(22A) | 0.9500   |
| N(2)-C(25)   | 1.387(7) |
| N(2)-C(33)   | 1.418(7) |
| N(2)-H(2A)   | 0.8800   |
| O(5)-C(24)   | 1.255(6) |
| O(6)-C(23)   | 1.379(6) |
| O(6)-H(6B)   | 0.8400   |
| C(23)-C(27)  | 1.501(7) |
| C(23)-C(24)  | 1.524(7) |
| C(24)-C(25)  | 1.430(7) |
| C(25)-C(26)  | 1.377(7) |
| C(26)-C(39)  | 1.476(7) |
| C(27)-C(28)  | 1.380(8) |
| C(27)-C(32)  | 1.387(8) |
| C(28)-C(29)  | 1.388(8) |
| C(28)-H(28A) | 0.9500   |
| C(29)-C(30)  | 1.375(9) |

|                  |          |
|------------------|----------|
| C(29)-H(29A)     | 0.9500   |
| C(30)-C(31)      | 1.384(9) |
| C(30)-H(30A)     | 0.9500   |
| C(31)-C(32)      | 1.386(8) |
| C(31)-H(31A)     | 0.9500   |
| C(32)-H(32A)     | 0.9500   |
| C(33)-C(34)      | 1.379(8) |
| C(33)-C(38)      | 1.385(7) |
| C(34)-C(35)      | 1.409(8) |
| C(34)-H(34A)     | 0.9500   |
| C(35)-C(36)      | 1.369(9) |
| C(35)-H(35A)     | 0.9500   |
| C(36)-C(37)      | 1.381(8) |
| C(36)-H(36A)     | 0.9500   |
| C(37)-C(38)      | 1.397(8) |
| C(37)-H(37A)     | 0.9500   |
| C(38)-H(38A)     | 0.9500   |
| C(39)-C(40)      | 1.356(8) |
| C(39)-C(44)      | 1.400(8) |
| C(40)-C(41)      | 1.391(7) |
| C(40)-H(40A)     | 0.9500   |
| C(41)-C(42)      | 1.401(8) |
| C(41)-H(41A)     | 0.9500   |
| C(42)-C(43)      | 1.373(9) |
| C(42)-H(42A)     | 0.9500   |
| C(43)-C(44)      | 1.394(8) |
| C(43)-H(43A)     | 0.9500   |
| C(44)-H(44A)     | 0.9500   |
|                  |          |
| C(4)-O(1)-C(1)   | 109.2(4) |
| C(1)-O(3)-H(3A)  | 109.5    |
| C(26)-O(4)-C(23) | 107.7(4) |
| C(3)-N(1)-C(11)  | 125.8(4) |
| C(3)-N(1)-H(1A)  | 117.1    |
| C(11)-N(1)-H(1A) | 117.1    |
| O(3)-C(1)-O(1)   | 108.6(4) |
| O(3)-C(1)-C(5)   | 110.6(4) |
| O(1)-C(1)-C(5)   | 110.1(4) |

|                    |          |
|--------------------|----------|
| O(3)-C(1)-C(2)     | 113.6(4) |
| O(1)-C(1)-C(2)     | 102.4(4) |
| C(5)-C(1)-C(2)     | 111.2(4) |
| O(2)-C(2)-C(3)     | 127.9(5) |
| O(2)-C(2)-C(1)     | 124.1(5) |
| C(3)-C(2)-C(1)     | 107.9(4) |
| C(4)-C(3)-N(1)     | 131.9(5) |
| C(4)-C(3)-C(2)     | 106.3(5) |
| N(1)-C(3)-C(2)     | 121.7(4) |
| O(1)-C(4)-C(3)     | 114.1(4) |
| O(1)-C(4)-C(17)    | 113.7(4) |
| C(3)-C(4)-C(17)    | 132.2(5) |
| C(10)-C(5)-C(6)    | 119.9(5) |
| C(10)-C(5)-C(1)    | 120.9(5) |
| C(6)-C(5)-C(1)     | 119.1(5) |
| C(5)-C(6)-C(7)     | 119.7(5) |
| C(5)-C(6)-H(6A)    | 120.2    |
| C(7)-C(6)-H(6A)    | 120.2    |
| C(8)-C(7)-C(6)     | 119.0(5) |
| C(8)-C(7)-H(7A)    | 120.5    |
| C(6)-C(7)-H(7A)    | 120.5    |
| C(7)-C(8)-C(9)     | 121.6(5) |
| C(7)-C(8)-H(8A)    | 119.2    |
| C(9)-C(8)-H(8A)    | 119.2    |
| C(8)-C(9)-C(10)    | 119.2(5) |
| C(8)-C(9)-H(9A)    | 120.4    |
| C(10)-C(9)-H(9A)   | 120.4    |
| C(5)-C(10)-C(9)    | 120.6(6) |
| C(5)-C(10)-H(10A)  | 119.7    |
| C(9)-C(10)-H(10A)  | 119.7    |
| C(16)-C(11)-C(12)  | 121.0(5) |
| C(16)-C(11)-N(1)   | 121.8(5) |
| C(12)-C(11)-N(1)   | 117.2(5) |
| C(13)-C(12)-C(11)  | 119.8(5) |
| C(13)-C(12)-H(12A) | 120.1    |
| C(11)-C(12)-H(12A) | 120.1    |
| C(14)-C(13)-C(12)  | 120.3(6) |
| C(14)-C(13)-H(13A) | 119.9    |

|                    |          |
|--------------------|----------|
| C(12)-C(13)-H(13A) | 119.9    |
| C(15)-C(14)-C(13)  | 119.9(6) |
| C(15)-C(14)-H(14A) | 120.1    |
| C(13)-C(14)-H(14A) | 120.1    |
| C(14)-C(15)-C(16)  | 120.7(6) |
| C(14)-C(15)-H(15A) | 119.6    |
| C(16)-C(15)-H(15A) | 119.6    |
| C(11)-C(16)-C(15)  | 118.2(5) |
| C(11)-C(16)-H(16A) | 120.9    |
| C(15)-C(16)-H(16A) | 120.9    |
| C(18)-C(17)-C(22)  | 120.1(5) |
| C(18)-C(17)-C(4)   | 121.5(5) |
| C(22)-C(17)-C(4)   | 118.4(5) |
| C(19)-C(18)-C(17)  | 119.5(5) |
| C(19)-C(18)-H(18A) | 120.2    |
| C(17)-C(18)-H(18A) | 120.2    |
| C(18)-C(19)-C(20)  | 120.2(5) |
| C(18)-C(19)-H(19A) | 119.9    |
| C(20)-C(19)-H(19A) | 119.9    |
| C(21)-C(20)-C(19)  | 120.2(5) |
| C(21)-C(20)-H(20A) | 119.9    |
| C(19)-C(20)-H(20A) | 119.9    |
| C(20)-C(21)-C(22)  | 119.9(5) |
| C(20)-C(21)-H(21A) | 120.0    |
| C(22)-C(21)-H(21A) | 120.0    |
| C(21)-C(22)-C(17)  | 120.0(5) |
| C(21)-C(22)-H(22A) | 120.0    |
| C(17)-C(22)-H(22A) | 120.0    |
| C(25)-N(2)-C(33)   | 125.6(4) |
| C(25)-N(2)-H(2A)   | 117.2    |
| C(33)-N(2)-H(2A)   | 117.2    |
| C(23)-O(6)-H(6B)   | 109.5    |
| O(6)-C(23)-O(4)    | 108.6(4) |
| O(6)-C(23)-C(27)   | 110.7(4) |
| O(4)-C(23)-C(27)   | 107.9(4) |
| O(6)-C(23)-C(24)   | 112.6(4) |
| O(4)-C(23)-C(24)   | 102.8(4) |
| C(27)-C(23)-C(24)  | 113.8(4) |



|                    |          |
|--------------------|----------|
| O(5)-C(24)-C(25)   | 127.3(5) |
| O(5)-C(24)-C(23)   | 124.3(4) |
| C(25)-C(24)-C(23)  | 108.4(4) |
| C(26)-C(25)-N(2)   | 129.1(4) |
| C(26)-C(25)-C(24)  | 105.7(4) |
| N(2)-C(25)-C(24)   | 125.2(4) |
| O(4)-C(26)-C(25)   | 115.5(4) |
| O(4)-C(26)-C(39)   | 113.4(4) |
| C(25)-C(26)-C(39)  | 131.1(5) |
| C(28)-C(27)-C(32)  | 120.1(5) |
| C(28)-C(27)-C(23)  | 121.0(5) |
| C(32)-C(27)-C(23)  | 118.8(5) |
| C(27)-C(28)-C(29)  | 119.8(5) |
| C(27)-C(28)-H(28A) | 120.1    |
| C(29)-C(28)-H(28A) | 120.1    |
| C(30)-C(29)-C(28)  | 120.3(5) |
| C(30)-C(29)-H(29A) | 119.8    |
| C(28)-C(29)-H(29A) | 119.8    |
| C(29)-C(30)-C(31)  | 119.9(5) |
| C(29)-C(30)-H(30A) | 120.1    |
| C(31)-C(30)-H(30A) | 120.1    |
| C(30)-C(31)-C(32)  | 120.1(5) |
| C(30)-C(31)-H(31A) | 119.9    |
| C(32)-C(31)-H(31A) | 119.9    |
| C(31)-C(32)-C(27)  | 119.7(6) |
| C(31)-C(32)-H(32A) | 120.1    |
| C(27)-C(32)-H(32A) | 120.1    |
| C(34)-C(33)-C(38)  | 120.3(5) |
| C(34)-C(33)-N(2)   | 117.8(5) |
| C(38)-C(33)-N(2)   | 121.9(5) |
| C(33)-C(34)-C(35)  | 119.0(5) |
| C(33)-C(34)-H(34A) | 120.5    |
| C(35)-C(34)-H(34A) | 120.5    |
| C(36)-C(35)-C(34)  | 120.9(5) |
| C(36)-C(35)-H(35A) | 119.5    |
| C(34)-C(35)-H(35A) | 119.5    |
| C(35)-C(36)-C(37)  | 119.8(5) |
| C(35)-C(36)-H(36A) | 120.1    |

|                    |          |
|--------------------|----------|
| C(37)-C(36)-H(36A) | 120.1    |
| C(36)-C(37)-C(38)  | 120.1(5) |
| C(36)-C(37)-H(37A) | 119.9    |
| C(38)-C(37)-H(37A) | 119.9    |
| C(33)-C(38)-C(37)  | 119.9(5) |
| C(33)-C(38)-H(38A) | 120.0    |
| C(37)-C(38)-H(38A) | 120.0    |
| C(40)-C(39)-C(44)  | 120.4(5) |
| C(40)-C(39)-C(26)  | 120.8(5) |
| C(44)-C(39)-C(26)  | 118.6(5) |
| C(39)-C(40)-C(41)  | 119.8(5) |
| C(39)-C(40)-H(40A) | 120.1    |
| C(41)-C(40)-H(40A) | 120.1    |
| C(40)-C(41)-C(42)  | 120.5(5) |
| C(40)-C(41)-H(41A) | 119.8    |
| C(42)-C(41)-H(41A) | 119.8    |
| C(43)-C(42)-C(41)  | 119.5(5) |
| C(43)-C(42)-H(42A) | 120.2    |
| C(41)-C(42)-H(42A) | 120.2    |
| C(42)-C(43)-C(44)  | 119.8(5) |
| C(42)-C(43)-H(43A) | 120.1    |
| C(44)-C(43)-H(43A) | 120.1    |
| C(43)-C(44)-C(39)  | 119.9(5) |
| C(43)-C(44)-H(44A) | 120.0    |
| C(39)-C(44)-H(44A) | 120.0    |

---

#### 4. Crystal data and structure refinement of compound **32**

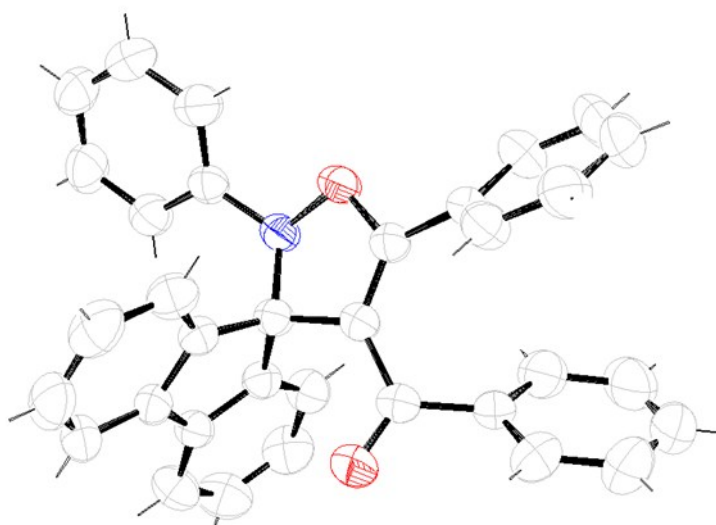

Table 1. Crystal data and structure refinement for Compound **32**.

|                             |                                                                                                                                         |
|-----------------------------|-----------------------------------------------------------------------------------------------------------------------------------------|
| Identification code         | <b>32</b>                                                                                                                               |
| Empirical formula           | C <sub>34</sub> H <sub>23</sub> N O <sub>2</sub>                                                                                        |
| Formula weight              | 477.53                                                                                                                                  |
| Temperature                 | 293(2) K                                                                                                                                |
| Wavelength                  | 0.71073 Å                                                                                                                               |
| Crystal system, space group | triclinic, P-1                                                                                                                          |
| Unit cell dimensions        | a = 8.1615(4) Å    alpha = 100.324(2) deg.<br>b = 11.8152(8) Å    beta = 91.527(2) deg.<br>c = 13.6440(10) Å    gamma = 102.577(2) deg. |
| Volume                      | 1260.37(14) Å <sup>3</sup>                                                                                                              |
| Z, Calculated density       | 2, 1.258 Mg/m <sup>3</sup>                                                                                                              |
| Absorption coefficient      | 0.078 mm <sup>-1</sup>                                                                                                                  |
| F(000)                      | 500                                                                                                                                     |
| Crystal size                | .35 x .3 x .25 mm                                                                                                                       |

|                                   |                                             |
|-----------------------------------|---------------------------------------------|
| Theta range for data collection   | 1.52 to 27.50 deg.                          |
| Limiting indices                  | -9 ≤ h ≤ 5, -15 ≤ k ≤ 15, -17 ≤ l ≤ 17      |
| Reflections collected / unique    | 9742 / 5531 [R(int) = 0.0210]               |
| Completeness to theta = 27.50     | 95.4 %                                      |
| Refinement method                 | Full-matrix least-squares on F <sup>2</sup> |
| Data / restraints / parameters    | 5531 / 0 / 334                              |
| Goodness-of-fit on F <sup>2</sup> | 1.026                                       |
| Final R indices [I > 2σ(I)]       | R1 = 0.0469, wR2 = 0.1239                   |
| R indices (all data)              | R1 = 0.0793, wR2 = 0.1562                   |
| Largest diff. peak and hole       | 0.147 and -0.199 e.Å <sup>-3</sup>          |

Table 2. Bond lengths [Å] and angles [deg] for Compound **32**.

---

|             |            |
|-------------|------------|
| O(1)-C(3)   | 1.3594(19) |
| O(1)-N(1)   | 1.4710(17) |
| O(2)-C(22)  | 1.2159(19) |
| N(1)-C(4)   | 1.423(2)   |
| N(1)-C(1)   | 1.508(2)   |
| C(1)-C(2)   | 1.518(2)   |
| C(1)-C(21)  | 1.522(2)   |
| C(1)-C(10)  | 1.523(2)   |
| C(2)-C(3)   | 1.340(2)   |
| C(2)-C(22)  | 1.471(2)   |
| C(3)-C(29)  | 1.472(2)   |
| C(4)-C(5)   | 1.377(3)   |
| C(4)-C(9)   | 1.389(2)   |
| C(5)-C(6)   | 1.383(3)   |
| C(5)-H(5)   | 0.9300     |
| C(6)-C(7)   | 1.362(3)   |
| C(6)-H(6)   | 0.9300     |
| C(7)-C(8)   | 1.369(3)   |
| C(7)-H(7)   | 0.9300     |
| C(8)-C(9)   | 1.380(3)   |
| C(8)-H(8)   | 0.9300     |
| C(9)-H(9)   | 0.9300     |
| C(10)-C(11) | 1.380(3)   |
| C(10)-C(15) | 1.399(2)   |
| C(11)-C(12) | 1.386(3)   |
| C(11)-H(11) | 0.9300     |
| C(12)-C(13) | 1.380(3)   |
| C(12)-H(12) | 0.9300     |
| C(13)-C(14) | 1.373(3)   |
| C(13)-H(13) | 0.9300     |
| C(14)-C(15) | 1.388(2)   |
| C(14)-H(14) | 0.9300     |
| C(15)-C(16) | 1.468(2)   |
| C(16)-C(17) | 1.382(2)   |
| C(16)-C(21) | 1.390(2)   |
| C(17)-C(18) | 1.378(3)   |
| C(17)-H(17) | 0.9300     |

|                 |            |
|-----------------|------------|
| C(18)-C(19)     | 1.376(3)   |
| C(18)-H(18)     | 0.9300     |
| C(19)-C(20)     | 1.388(3)   |
| C(19)-H(19)     | 0.9300     |
| C(20)-C(21)     | 1.374(3)   |
| C(20)-H(20)     | 0.9300     |
| C(22)-C(23)     | 1.490(2)   |
| C(23)-C(24)     | 1.371(3)   |
| C(23)-C(28)     | 1.378(3)   |
| C(24)-C(25)     | 1.392(3)   |
| C(24)-H(24)     | 0.9300     |
| C(25)-C(26)     | 1.368(4)   |
| C(25)-H(25)     | 0.9300     |
| C(26)-C(27)     | 1.347(4)   |
| C(26)-H(26)     | 0.9300     |
| C(27)-C(28)     | 1.374(3)   |
| C(27)-H(27)     | 0.9300     |
| C(28)-H(28)     | 0.9300     |
| C(29)-C(30)     | 1.380(2)   |
| C(29)-C(34)     | 1.386(2)   |
| C(30)-C(31)     | 1.382(3)   |
| C(30)-H(30)     | 0.9300     |
| C(31)-C(32)     | 1.366(3)   |
| C(31)-H(31)     | 0.9300     |
| C(32)-C(33)     | 1.376(3)   |
| C(32)-H(32)     | 0.9300     |
| C(33)-C(34)     | 1.381(3)   |
| C(33)-H(33)     | 0.9300     |
| C(34)-H(34)     | 0.9300     |
|                 |            |
| C(3)-O(1)-N(1)  | 105.45(11) |
| C(4)-N(1)-O(1)  | 108.11(12) |
| C(4)-N(1)-C(1)  | 119.83(13) |
| O(1)-N(1)-C(1)  | 106.19(11) |
| N(1)-C(1)-C(2)  | 99.15(12)  |
| N(1)-C(1)-C(21) | 110.71(13) |
| C(2)-C(1)-C(21) | 114.20(14) |
| N(1)-C(1)-C(10) | 117.52(13) |

|                   |            |
|-------------------|------------|
| C(2)-C(1)-C(10)   | 113.81(13) |
| C(21)-C(1)-C(10)  | 102.06(13) |
| C(3)-C(2)-C(22)   | 128.17(15) |
| C(3)-C(2)-C(1)    | 109.05(14) |
| C(22)-C(2)-C(1)   | 122.68(14) |
| C(2)-C(3)-O(1)    | 113.26(14) |
| C(2)-C(3)-C(29)   | 132.70(15) |
| O(1)-C(3)-C(29)   | 113.89(13) |
| C(5)-C(4)-C(9)    | 119.31(17) |
| C(5)-C(4)-N(1)    | 122.74(16) |
| C(9)-C(4)-N(1)    | 117.77(15) |
| C(4)-C(5)-C(6)    | 119.8(2)   |
| C(4)-C(5)-H(5)    | 120.1      |
| C(6)-C(5)-H(5)    | 120.1      |
| C(7)-C(6)-C(5)    | 121.0(2)   |
| C(7)-C(6)-H(6)    | 119.5      |
| C(5)-C(6)-H(6)    | 119.5      |
| C(6)-C(7)-C(8)    | 119.30(19) |
| C(6)-C(7)-H(7)    | 120.3      |
| C(8)-C(7)-H(7)    | 120.3      |
| C(7)-C(8)-C(9)    | 121.0(2)   |
| C(7)-C(8)-H(8)    | 119.5      |
| C(9)-C(8)-H(8)    | 119.5      |
| C(8)-C(9)-C(4)    | 119.58(19) |
| C(8)-C(9)-H(9)    | 120.2      |
| C(4)-C(9)-H(9)    | 120.2      |
| C(11)-C(10)-C(15) | 120.57(16) |
| C(11)-C(10)-C(1)  | 129.29(16) |
| C(15)-C(10)-C(1)  | 110.06(14) |
| C(10)-C(11)-C(12) | 118.60(19) |
| C(10)-C(11)-H(11) | 120.7      |
| C(12)-C(11)-H(11) | 120.7      |
| C(13)-C(12)-C(11) | 120.39(19) |
| C(13)-C(12)-H(12) | 119.8      |
| C(11)-C(12)-H(12) | 119.8      |
| C(14)-C(13)-C(12) | 121.81(19) |
| C(14)-C(13)-H(13) | 119.1      |
| C(12)-C(13)-H(13) | 119.1      |

|                   |            |
|-------------------|------------|
| C(13)-C(14)-C(15) | 118.14(19) |
| C(13)-C(14)-H(14) | 120.9      |
| C(15)-C(14)-H(14) | 120.9      |
| C(14)-C(15)-C(10) | 120.47(16) |
| C(14)-C(15)-C(16) | 130.88(16) |
| C(10)-C(15)-C(16) | 108.61(14) |
| C(17)-C(16)-C(21) | 119.81(17) |
| C(17)-C(16)-C(15) | 131.19(17) |
| C(21)-C(16)-C(15) | 109.00(14) |
| C(18)-C(17)-C(16) | 118.50(19) |
| C(18)-C(17)-H(17) | 120.8      |
| C(16)-C(17)-H(17) | 120.8      |
| C(19)-C(18)-C(17) | 121.60(19) |
| C(19)-C(18)-H(18) | 119.2      |
| C(17)-C(18)-H(18) | 119.2      |
| C(18)-C(19)-C(20) | 120.2(2)   |
| C(18)-C(19)-H(19) | 119.9      |
| C(20)-C(19)-H(19) | 119.9      |
| C(21)-C(20)-C(19) | 118.26(18) |
| C(21)-C(20)-H(20) | 120.9      |
| C(19)-C(20)-H(20) | 120.9      |
| C(20)-C(21)-C(16) | 121.57(16) |
| C(20)-C(21)-C(1)  | 128.15(15) |
| C(16)-C(21)-C(1)  | 110.23(14) |
| O(2)-C(22)-C(2)   | 120.78(16) |
| O(2)-C(22)-C(23)  | 120.45(15) |
| C(2)-C(22)-C(23)  | 118.74(14) |
| C(24)-C(23)-C(28) | 118.67(18) |
| C(24)-C(23)-C(22) | 123.20(17) |
| C(28)-C(23)-C(22) | 118.12(17) |
| C(23)-C(24)-C(25) | 119.8(2)   |
| C(23)-C(24)-H(24) | 120.1      |
| C(25)-C(24)-H(24) | 120.1      |
| C(26)-C(25)-C(24) | 120.1(2)   |
| C(26)-C(25)-H(25) | 120.0      |
| C(24)-C(25)-H(25) | 120.0      |
| C(27)-C(26)-C(25) | 120.4(2)   |
| C(27)-C(26)-H(26) | 119.8      |

|                   |            |
|-------------------|------------|
| C(25)-C(26)-H(26) | 119.8      |
| C(26)-C(27)-C(28) | 120.0(3)   |
| C(26)-C(27)-H(27) | 120.0      |
| C(28)-C(27)-H(27) | 120.0      |
| C(27)-C(28)-C(23) | 121.1(2)   |
| C(27)-C(28)-H(28) | 119.4      |
| C(23)-C(28)-H(28) | 119.4      |
| C(30)-C(29)-C(34) | 119.39(16) |
| C(30)-C(29)-C(3)  | 119.21(15) |
| C(34)-C(29)-C(3)  | 121.40(16) |
| C(29)-C(30)-C(31) | 120.65(18) |
| C(29)-C(30)-H(30) | 119.7      |
| C(31)-C(30)-H(30) | 119.7      |
| C(32)-C(31)-C(30) | 119.9(2)   |
| C(32)-C(31)-H(31) | 120.0      |
| C(30)-C(31)-H(31) | 120.0      |
| C(31)-C(32)-C(33) | 119.77(19) |
| C(31)-C(32)-H(32) | 120.1      |
| C(33)-C(32)-H(32) | 120.1      |
| C(32)-C(33)-C(34) | 120.97(19) |
| C(32)-C(33)-H(33) | 119.5      |
| C(34)-C(33)-H(33) | 119.5      |
| C(33)-C(34)-C(29) | 119.26(19) |
| C(33)-C(34)-H(34) | 120.4      |
| C(29)-C(34)-H(34) | 120.4      |

---

Symmetry transformations used to generate equivalent atoms:



#### 4. Crystal data and structure refinement of compound **36**

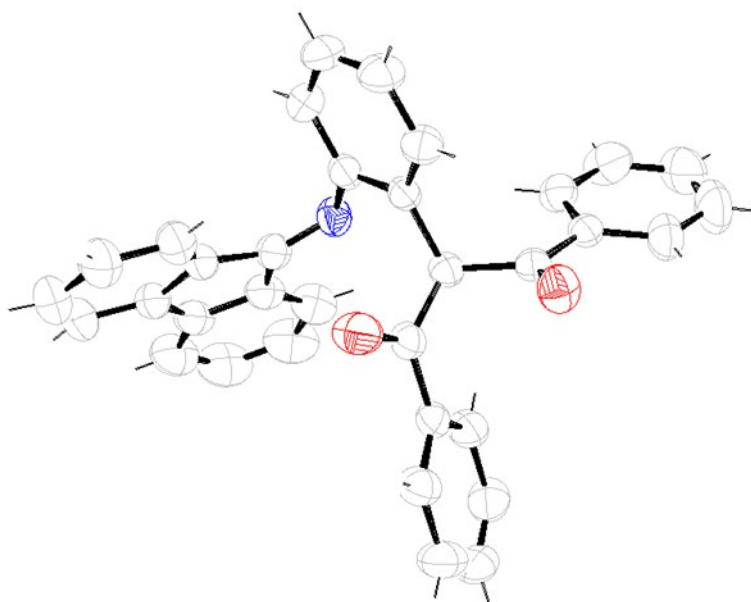

Table 1. Crystal data and structure refinement for Compound **36**.

|                                 |                                                                                                                          |
|---------------------------------|--------------------------------------------------------------------------------------------------------------------------|
| Identification code             | <b>36</b>                                                                                                                |
| Empirical formula               | C <sub>34</sub> H <sub>23</sub> N O <sub>2</sub>                                                                         |
| Formula weight                  | 477.53                                                                                                                   |
| Temperature                     | 293(2) K                                                                                                                 |
| Wavelength                      | 0.71073 Å                                                                                                                |
| Crystal system, space group     | monoclinic, P2 <sub>1</sub> /n                                                                                           |
| Unit cell dimensions            | a = 12.7719(7) Å    alpha = 90 deg.<br>b = 8.2486(3) Å    beta = 102.757(2) deg.<br>c = 24.3125(14) Å    gamma = 90 deg. |
| Volume                          | 2498.1(2) Å <sup>3</sup>                                                                                                 |
| Z, Calculated density           | 4, 1.270 Mg/m <sup>3</sup>                                                                                               |
| Absorption coefficient          | 0.078 mm <sup>-1</sup>                                                                                                   |
| F(000)                          | 1000                                                                                                                     |
| Crystal size                    | .4 x .3 x .2 mm                                                                                                          |
| Theta range for data collection | 1.67 to 27.50 deg.                                                                                                       |
| Limiting indices                | -16 ≤ h ≤ 15, -10 ≤ k ≤ 5, -15 ≤ l ≤ 31                                                                                  |
| Reflections collected / unique  | 8669 / 5560 [R(int) = 0.0187]                                                                                            |
| Completeness to theta = 27.50   | 96.9 %                                                                                                                   |
| Refinement method               | Full-matrix least-squares on F <sup>2</sup>                                                                              |

Data / restraints / parameters 5560 / 0 / 334  
Goodness-of-fit on F<sup>2</sup> 1.012  
Final R indices [I>2sigma(I)] R1 = 0.0480, wR2 = 0.1271  
R indices (all data) R1 = 0.0903, wR2 = 0.1670  
Largest diff. peak and hole 0.170 and -0.182 e.A<sup>-3</sup>

Table 2. Bond lengths [Å] and angles [deg] for Compound **36**.

---

|             |          |
|-------------|----------|
| C(1)-N(1)   | 1.277(2) |
| C(1)-C(2)   | 1.482(3) |
| C(1)-C(13)  | 1.486(3) |
| C(2)-C(3)   | 1.380(3) |
| C(2)-C(7)   | 1.392(3) |
| C(3)-C(4)   | 1.384(3) |
| C(3)-H(3)   | 0.9300   |
| C(4)-C(5)   | 1.365(4) |
| C(4)-H(4)   | 0.9300   |
| C(5)-C(6)   | 1.376(4) |
| C(5)-H(5)   | 0.9300   |
| C(6)-C(7)   | 1.389(3) |
| C(6)-H(6)   | 0.9300   |
| C(7)-C(8)   | 1.467(3) |
| C(8)-C(9)   | 1.382(3) |
| C(8)-C(13)  | 1.407(3) |
| C(9)-C(10)  | 1.376(4) |
| C(9)-H(9)   | 0.9300   |
| C(10)-C(11) | 1.374(4) |
| C(10)-H(10) | 0.9300   |
| C(11)-C(12) | 1.386(3) |
| C(11)-H(11) | 0.9300   |
| C(12)-C(13) | 1.379(3) |
| C(12)-H(12) | 0.9300   |
| C(14)-C(15) | 1.394(3) |
| C(14)-C(19) | 1.396(2) |
| C(14)-N(1)  | 1.414(2) |
| C(15)-C(16) | 1.375(3) |
| C(15)-H(15) | 0.9300   |

|                |            |
|----------------|------------|
| C(16)-C(17)    | 1.373(3)   |
| C(16)-H(16)    | 0.9300     |
| C(17)-C(18)    | 1.379(3)   |
| C(17)-H(17)    | 0.9300     |
| C(18)-C(19)    | 1.384(2)   |
| C(18)-H(18)    | 0.9300     |
| C(19)-C(20)    | 1.515(2)   |
| C(20)-C(21)    | 1.520(2)   |
| C(20)-C(28)    | 1.537(2)   |
| C(20)-H(20)    | 0.9800     |
| C(21)-O(1)     | 1.214(2)   |
| C(21)-C(22)    | 1.487(2)   |
| C(22)-C(27)    | 1.388(3)   |
| C(22)-C(23)    | 1.390(3)   |
| C(23)-C(24)    | 1.373(3)   |
| C(23)-H(23)    | 0.9300     |
| C(24)-C(25)    | 1.362(4)   |
| C(24)-H(24)    | 0.9300     |
| C(25)-C(26)    | 1.369(4)   |
| C(25)-H(25)    | 0.9300     |
| C(26)-C(27)    | 1.384(3)   |
| C(26)-H(26)    | 0.9300     |
| C(27)-H(27)    | 0.9300     |
| C(28)-O(2)     | 1.207(2)   |
| C(28)-C(29)    | 1.491(2)   |
| C(29)-C(30)    | 1.382(3)   |
| C(29)-C(34)    | 1.391(3)   |
| C(30)-C(31)    | 1.378(3)   |
| C(30)-H(30)    | 0.9300     |
| C(31)-C(32)    | 1.369(3)   |
| C(31)-H(31)    | 0.9300     |
| C(32)-C(33)    | 1.367(3)   |
| C(32)-H(32)    | 0.9300     |
| C(33)-C(34)    | 1.387(3)   |
| C(33)-H(33)    | 0.9300     |
| C(34)-H(34)    | 0.9300     |
| <br>           |            |
| N(1)-C(1)-C(2) | 121.14(17) |

|                   |            |
|-------------------|------------|
| N(1)-C(1)-C(13)   | 133.35(17) |
| C(2)-C(1)-C(13)   | 105.51(16) |
| C(3)-C(2)-C(7)    | 121.19(19) |
| C(3)-C(2)-C(1)    | 129.7(2)   |
| C(7)-C(2)-C(1)    | 109.08(18) |
| C(2)-C(3)-C(4)    | 117.6(2)   |
| C(2)-C(3)-H(3)    | 121.2      |
| C(4)-C(3)-H(3)    | 121.2      |
| C(5)-C(4)-C(3)    | 121.4(3)   |
| C(5)-C(4)-H(4)    | 119.3      |
| C(3)-C(4)-H(4)    | 119.3      |
| C(4)-C(5)-C(6)    | 121.4(2)   |
| C(4)-C(5)-H(5)    | 119.3      |
| C(6)-C(5)-H(5)    | 119.3      |
| C(5)-C(6)-C(7)    | 118.1(3)   |
| C(5)-C(6)-H(6)    | 120.9      |
| C(7)-C(6)-H(6)    | 120.9      |
| C(6)-C(7)-C(2)    | 120.2(2)   |
| C(6)-C(7)-C(8)    | 131.4(2)   |
| C(2)-C(7)-C(8)    | 108.33(17) |
| C(9)-C(8)-C(13)   | 120.4(2)   |
| C(9)-C(8)-C(7)    | 130.6(2)   |
| C(13)-C(8)-C(7)   | 108.96(17) |
| C(10)-C(9)-C(8)   | 118.8(2)   |
| C(10)-C(9)-H(9)   | 120.6      |
| C(8)-C(9)-H(9)    | 120.6      |
| C(11)-C(10)-C(9)  | 120.9(2)   |
| C(11)-C(10)-H(10) | 119.5      |
| C(9)-C(10)-H(10)  | 119.5      |
| C(10)-C(11)-C(12) | 121.2(2)   |
| C(10)-C(11)-H(11) | 119.4      |
| C(12)-C(11)-H(11) | 119.4      |
| C(13)-C(12)-C(11) | 118.5(2)   |
| C(13)-C(12)-H(12) | 120.8      |
| C(11)-C(12)-H(12) | 120.8      |
| C(12)-C(13)-C(8)  | 120.19(19) |
| C(12)-C(13)-C(1)  | 131.86(18) |
| C(8)-C(13)-C(1)   | 107.88(17) |

|                   |            |
|-------------------|------------|
| C(15)-C(14)-C(19) | 119.52(16) |
| C(15)-C(14)-N(1)  | 122.27(17) |
| C(19)-C(14)-N(1)  | 117.95(14) |
| C(16)-C(15)-C(14) | 120.18(19) |
| C(16)-C(15)-H(15) | 119.9      |
| C(14)-C(15)-H(15) | 119.9      |
| C(17)-C(16)-C(15) | 120.43(17) |
| C(17)-C(16)-H(16) | 119.8      |
| C(15)-C(16)-H(16) | 119.8      |
| C(16)-C(17)-C(18) | 119.85(18) |
| C(16)-C(17)-H(17) | 120.1      |
| C(18)-C(17)-H(17) | 120.1      |
| C(17)-C(18)-C(19) | 120.91(19) |
| C(17)-C(18)-H(18) | 119.5      |
| C(19)-C(18)-H(18) | 119.5      |
| C(18)-C(19)-C(14) | 119.10(15) |
| C(18)-C(19)-C(20) | 122.58(16) |
| C(14)-C(19)-C(20) | 118.32(14) |
| C(19)-C(20)-C(21) | 111.50(13) |
| C(19)-C(20)-C(28) | 112.29(13) |
| C(21)-C(20)-C(28) | 110.14(14) |
| C(19)-C(20)-H(20) | 107.6      |
| C(21)-C(20)-H(20) | 107.6      |
| C(28)-C(20)-H(20) | 107.6      |
| O(1)-C(21)-C(22)  | 120.84(17) |
| O(1)-C(21)-C(20)  | 120.18(16) |
| C(22)-C(21)-C(20) | 118.98(15) |
| C(27)-C(22)-C(23) | 118.66(18) |
| C(27)-C(22)-C(21) | 122.74(17) |
| C(23)-C(22)-C(21) | 118.60(17) |
| C(24)-C(23)-C(22) | 120.7(2)   |
| C(24)-C(23)-H(23) | 119.6      |
| C(22)-C(23)-H(23) | 119.6      |
| C(25)-C(24)-C(23) | 120.0(2)   |
| C(25)-C(24)-H(24) | 120.0      |
| C(23)-C(24)-H(24) | 120.0      |
| C(24)-C(25)-C(26) | 120.6(2)   |
| C(24)-C(25)-H(25) | 119.7      |

|                   |            |
|-------------------|------------|
| C(26)-C(25)-H(25) | 119.7      |
| C(25)-C(26)-C(27) | 120.1(2)   |
| C(25)-C(26)-H(26) | 119.9      |
| C(27)-C(26)-H(26) | 119.9      |
| C(26)-C(27)-C(22) | 119.9(2)   |
| C(26)-C(27)-H(27) | 120.1      |
| C(22)-C(27)-H(27) | 120.1      |
| O(2)-C(28)-C(29)  | 121.21(16) |
| O(2)-C(28)-C(20)  | 121.08(15) |
| C(29)-C(28)-C(20) | 117.71(14) |
| C(30)-C(29)-C(34) | 118.62(17) |
| C(30)-C(29)-C(28) | 118.77(16) |
| C(34)-C(29)-C(28) | 122.61(16) |
| C(31)-C(30)-C(29) | 120.3(2)   |
| C(31)-C(30)-H(30) | 119.9      |
| C(29)-C(30)-H(30) | 119.9      |
| C(32)-C(31)-C(30) | 120.5(2)   |
| C(32)-C(31)-H(31) | 119.7      |
| C(30)-C(31)-H(31) | 119.7      |
| C(33)-C(32)-C(31) | 120.37(18) |
| C(33)-C(32)-H(32) | 119.8      |
| C(31)-C(32)-H(32) | 119.8      |
| C(32)-C(33)-C(34) | 119.5(2)   |
| C(32)-C(33)-H(33) | 120.2      |
| C(34)-C(33)-H(33) | 120.2      |
| C(33)-C(34)-C(29) | 120.7(2)   |
| C(33)-C(34)-H(34) | 119.7      |
| C(29)-C(34)-H(34) | 119.7      |
| C(1)-N(1)-C(14)   | 122.58(16) |

---

Symmetry transformations used to generate equivalent atoms:

Copies of <sup>1</sup>H and <sup>13</sup>C NMR spectra for reported compounds:-

(Z)-N-(naphthalen-1-ylmethylene)-1-phenylmethanamine oxide (6b)

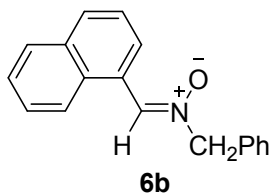

<sup>1</sup>H NMR Spectrum of Compound 6b

Yield = 77%

White solid, mp: 82°C

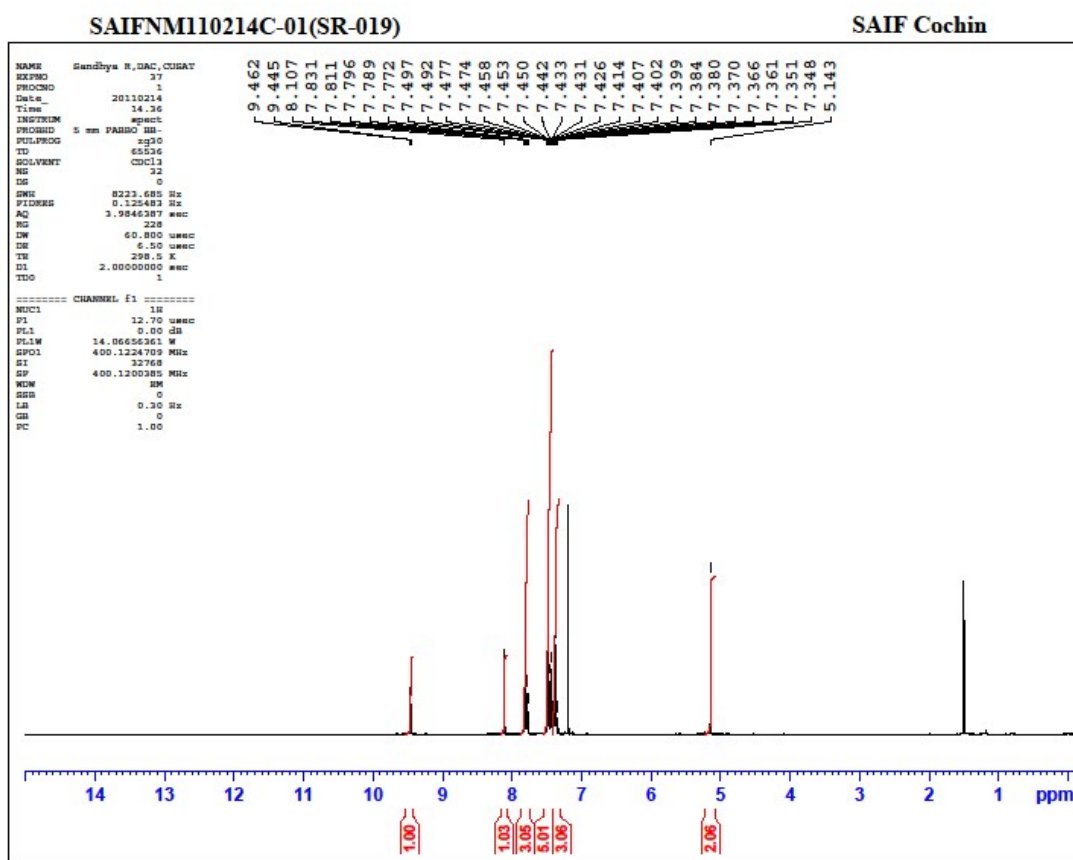

# <sup>13</sup>C NMR Spectrum of Compound 6b

SAIFNMI10211-06(SR-019)

SAIF Cochin

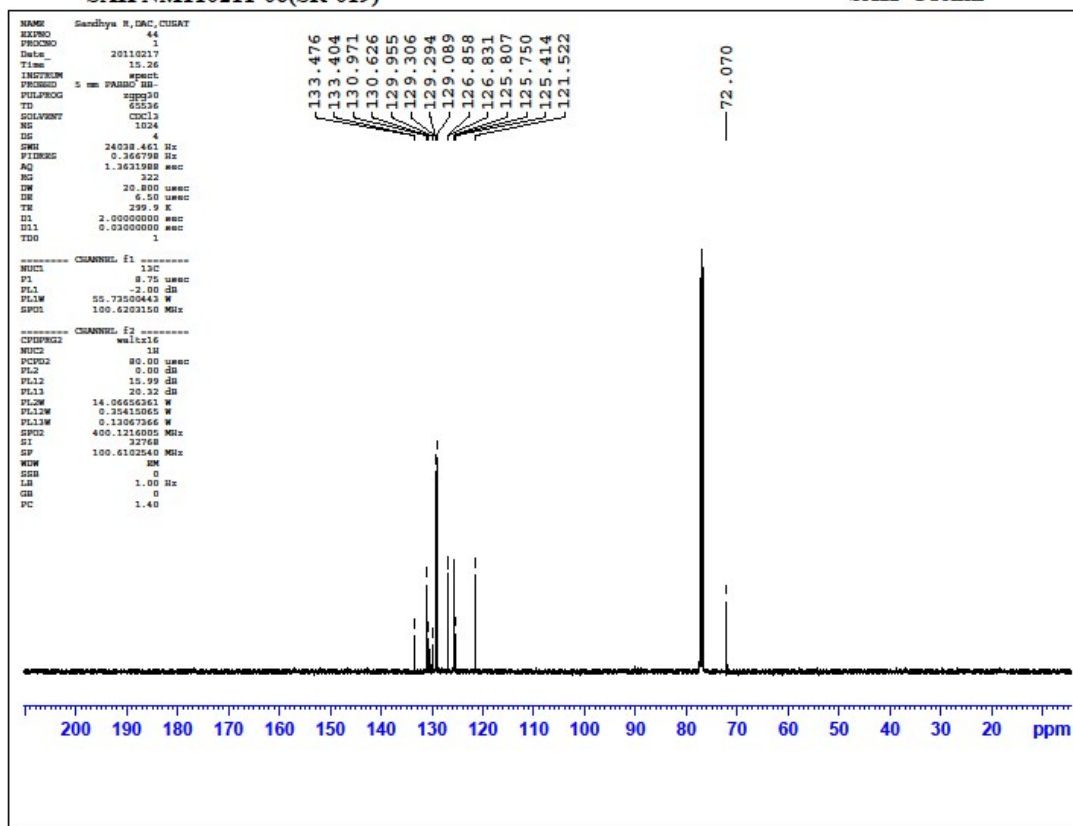



**N-(9H-fluoren-9-ylidene)naphthalen-1-amine oxide (10)**

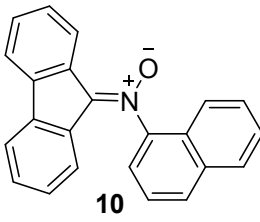

Yield = 79%

Yellow solid, mp: 157°C

**<sup>1</sup>H NMR Spectrum of Compound 10**

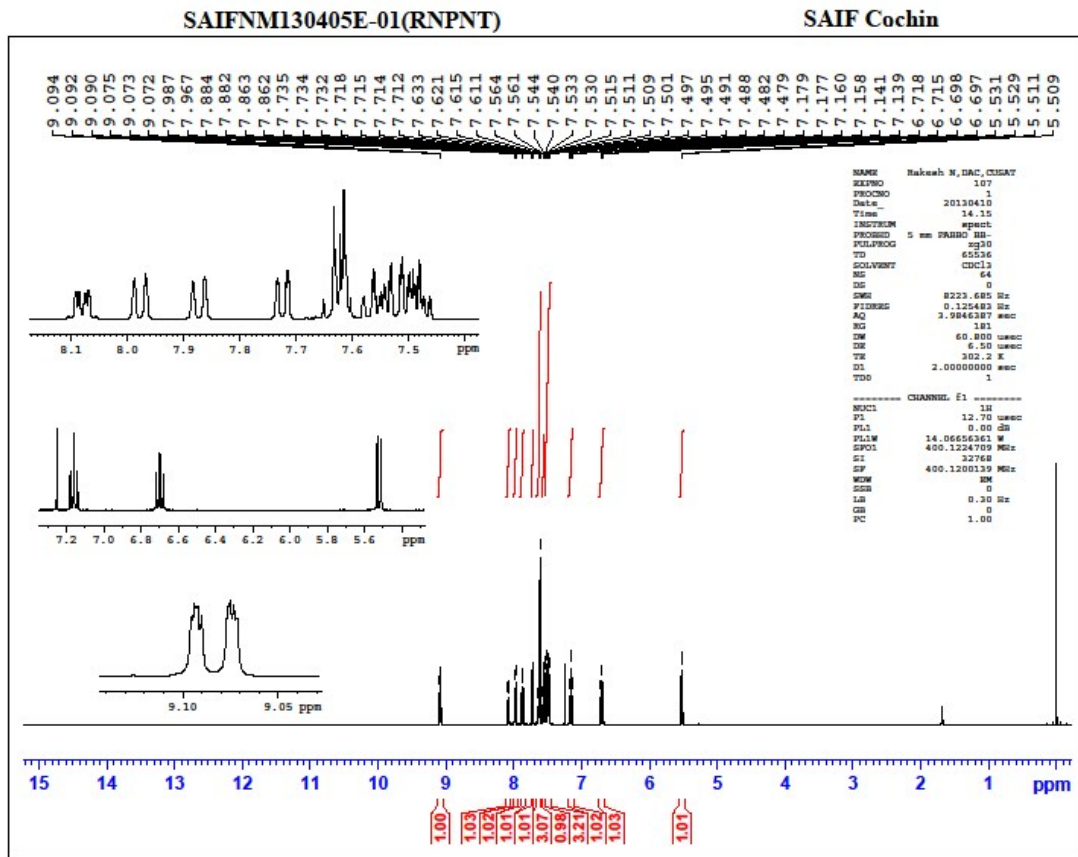

# <sup>13</sup>C NMR Spectrum of Compound 10

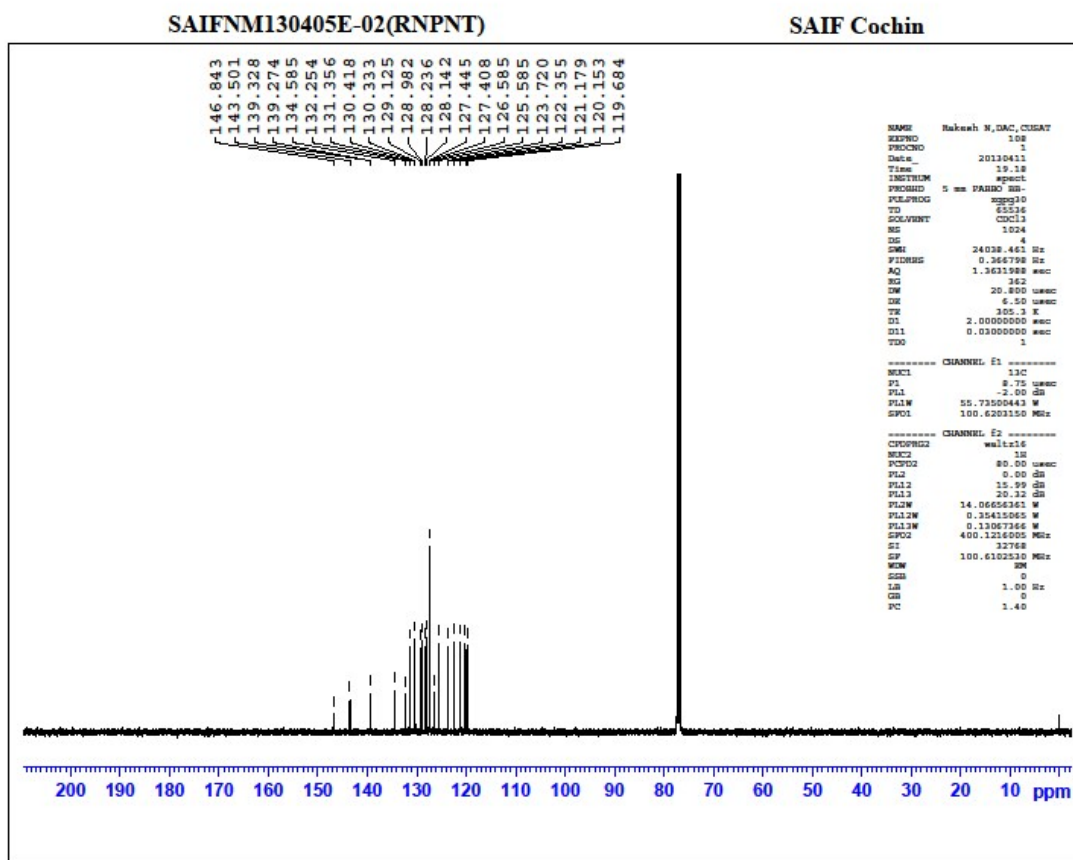

**(2-*tert*-butyl-3-phenyl-2,3-dihydroisoxazole-4,5-diyl)bis(phenylmethanone) (13a)**

Yield = 85%

Pale Yellow solid, mp: 110°C

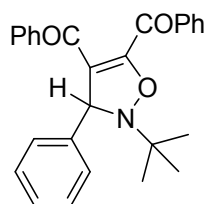

**<sup>1</sup>H NMR Spectrum of Compound 13a**

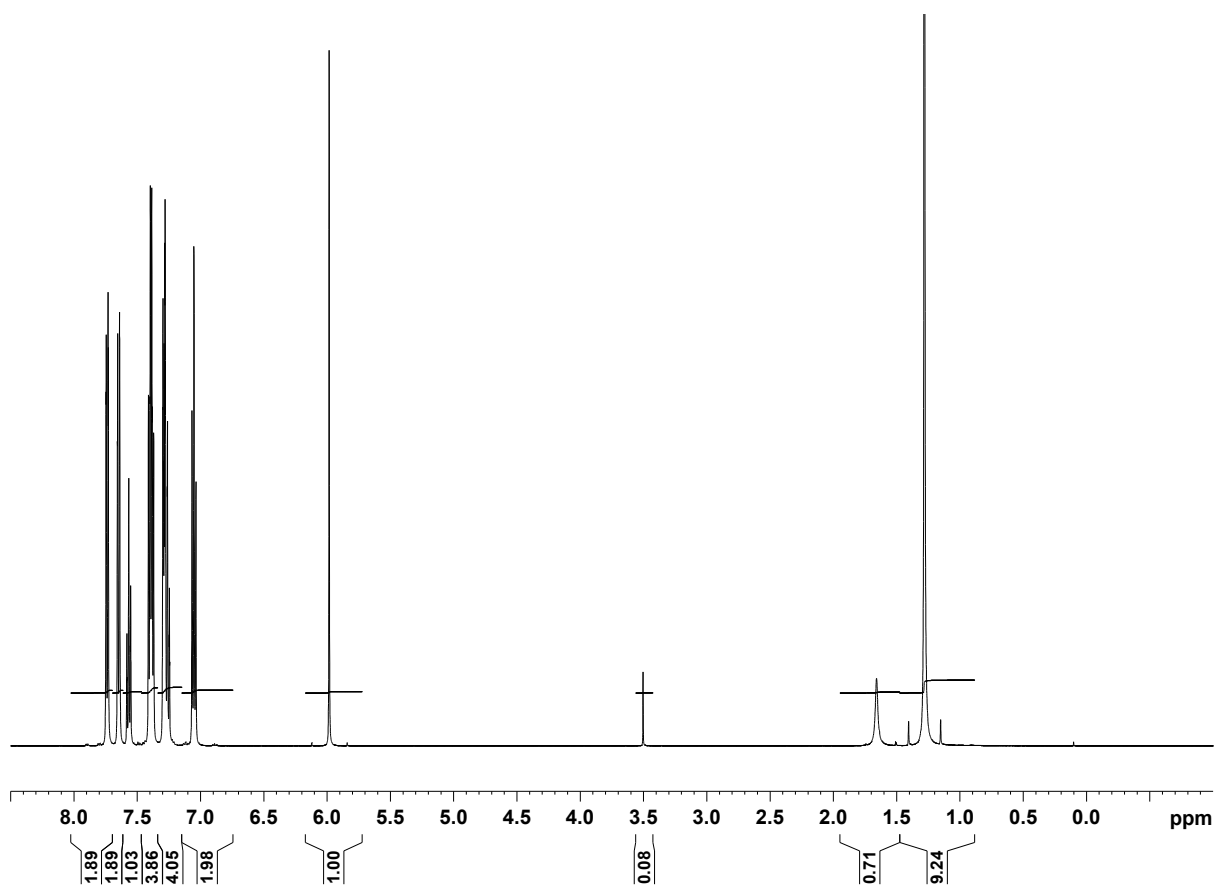

# <sup>13</sup>C NMR Spectrum of Compound 13a

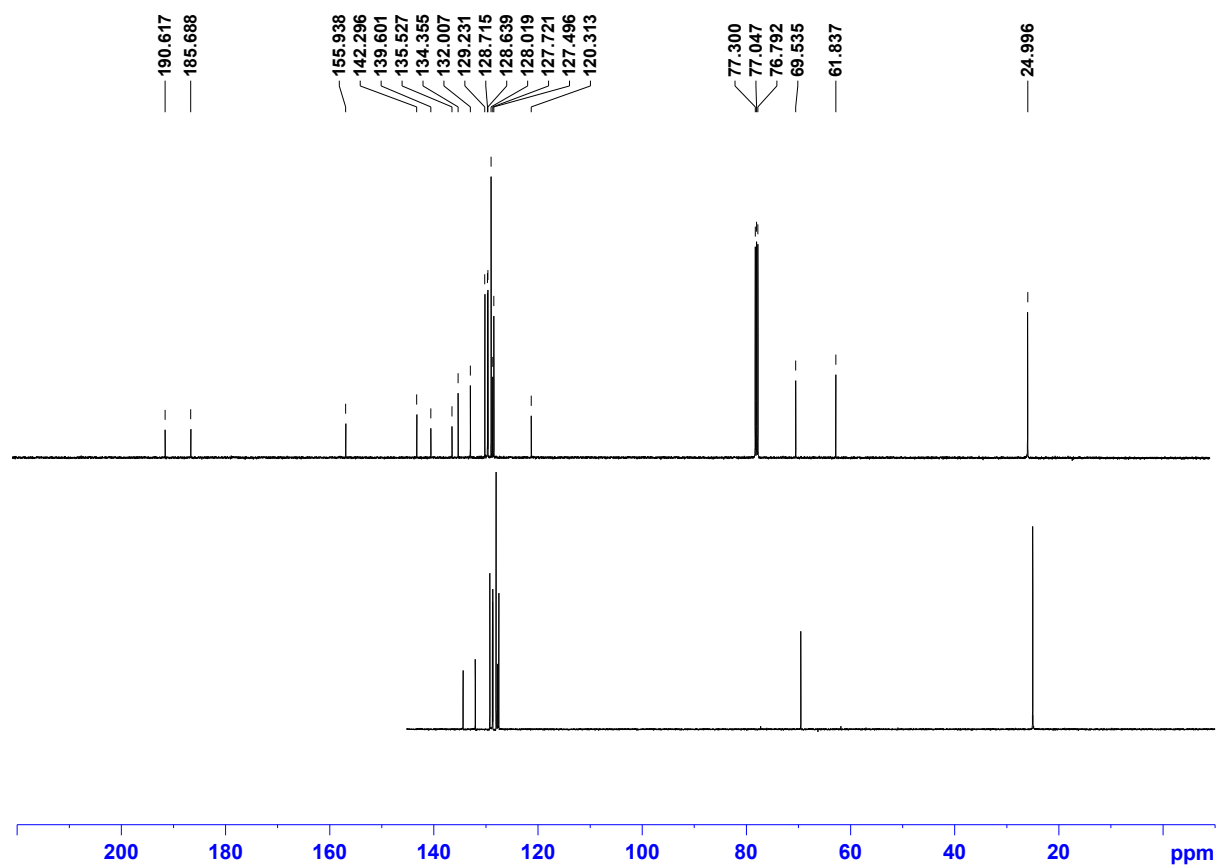

(2-benzyl-3-(naphthalen-1-yl)-2,3-dihydroisoxazole-4,5-diyl)bis(phenylmethanone) (13b)

Yield = 83%

Pale Yellow solid, mp: 134°C

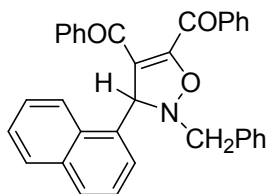

<sup>1</sup>H NMR Spectrum of Compound 13b

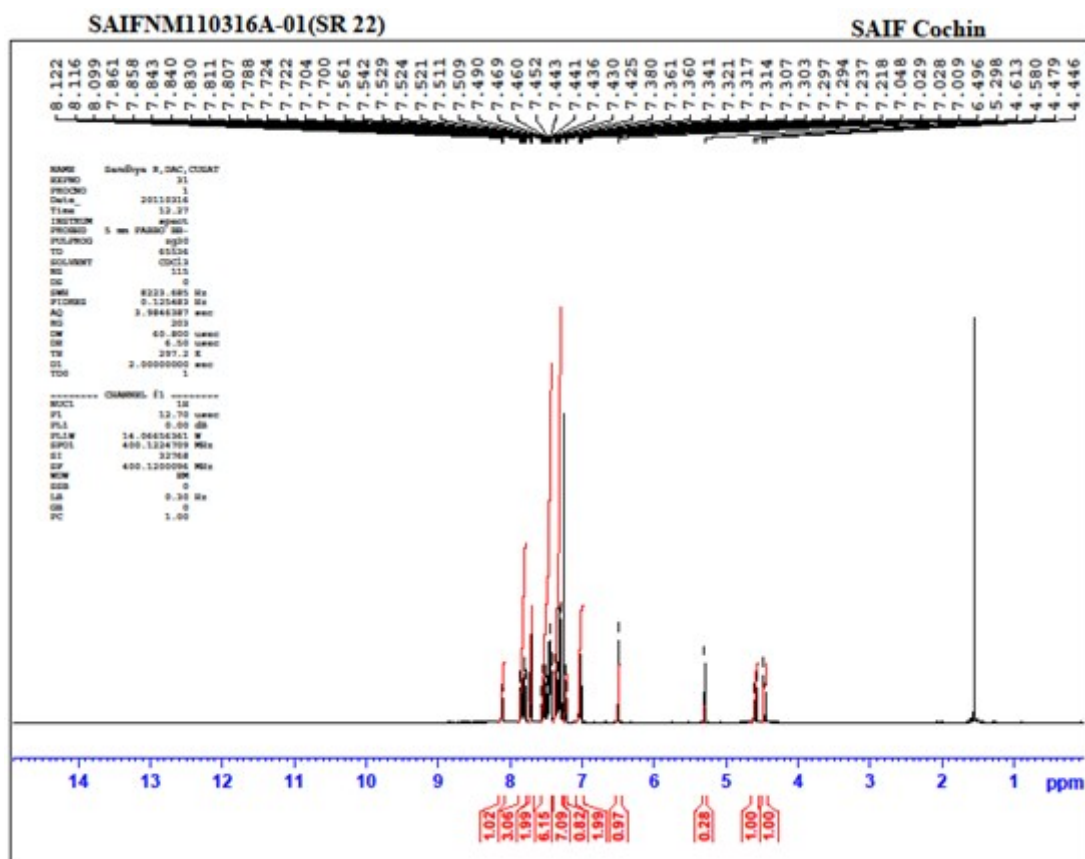

# <sup>13</sup>C NMR Spectrum of Compound 13b

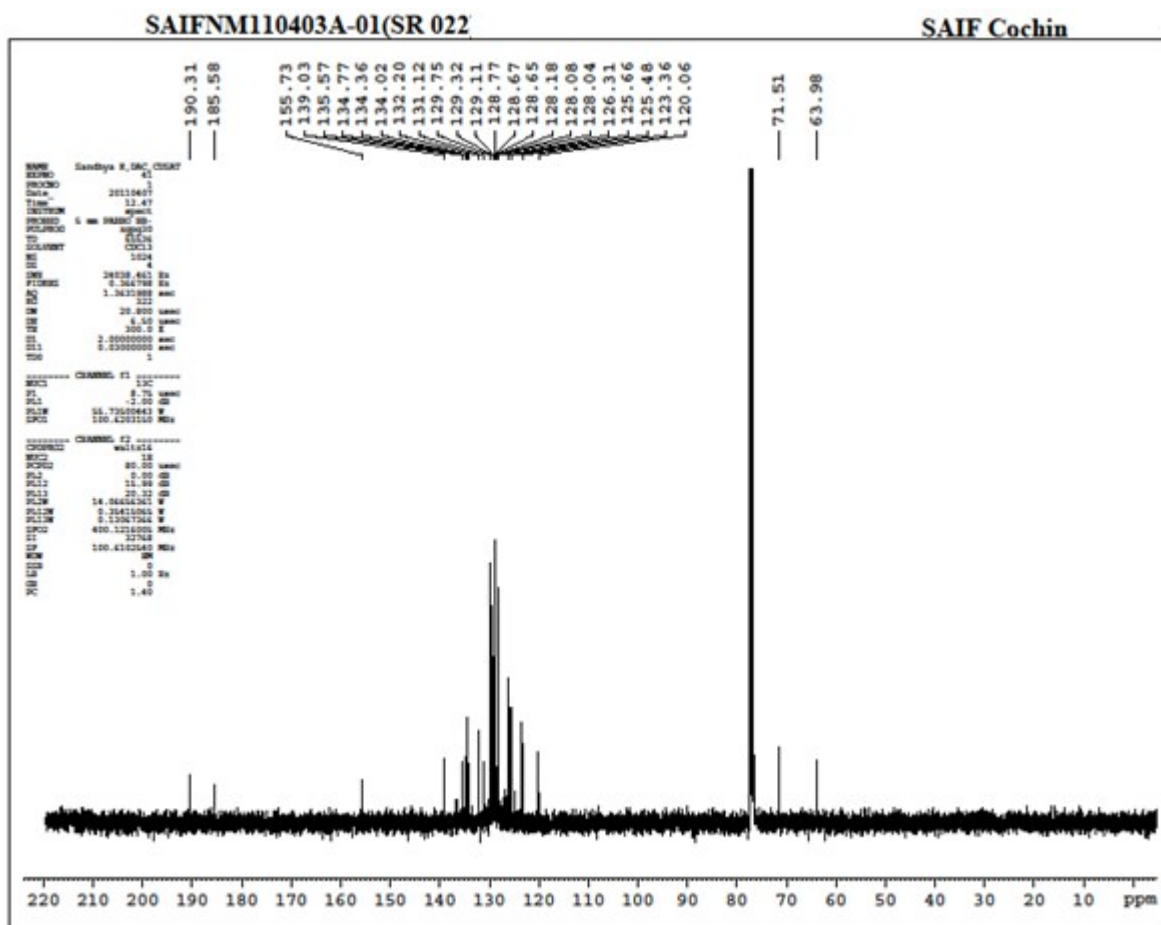

(2'-phenyl-2'H-spiro[fluorene-9,3'-isoxazole]-4',5'-diyl)bis(phenylmethanone) (15)

Yield = 18%

Yellow solid, mp: 120°C

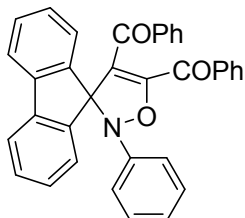

<sup>1</sup>H NMR Spectrum of Compound 15

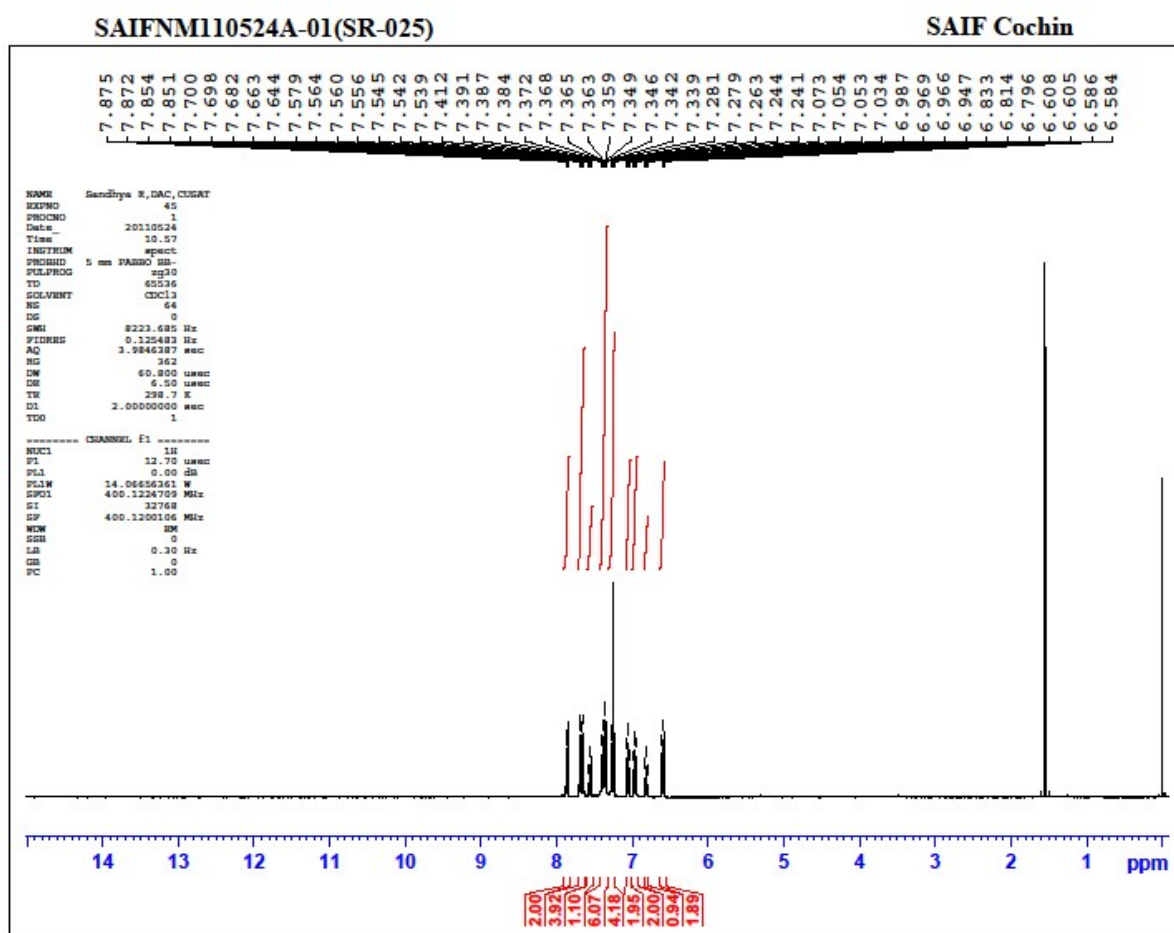

# <sup>13</sup>C NMR Spectrum of Compound 15

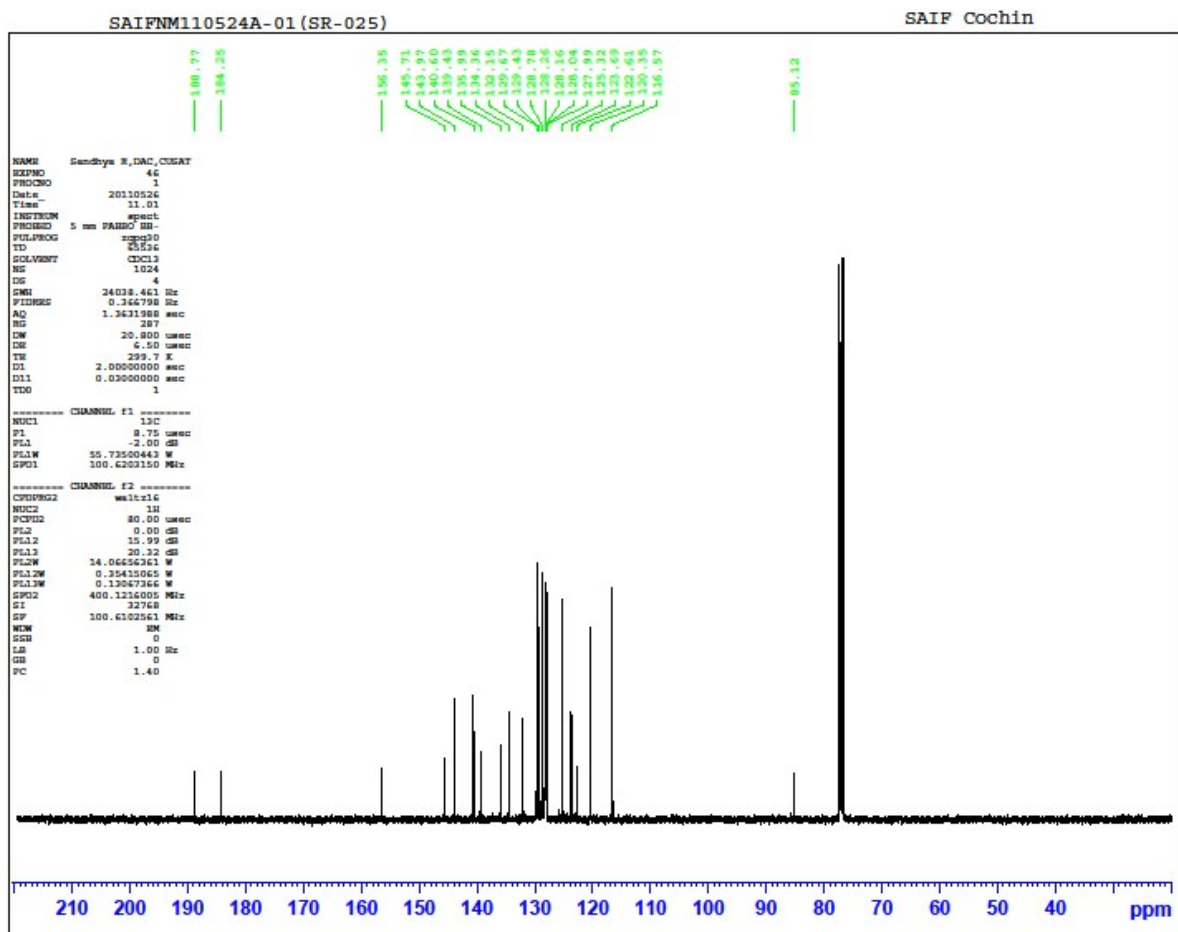



**4-(2-(9H-fluoren-9-ylideneamino)phenyl)-2-hydroxy-2,5-diphenylfuran-3(2H)-one (17)**

Yield = 72%

Yellow solid, mp: 206°C

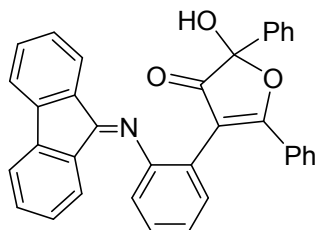

**<sup>1</sup>H NMR Spectrum of Compound 17**

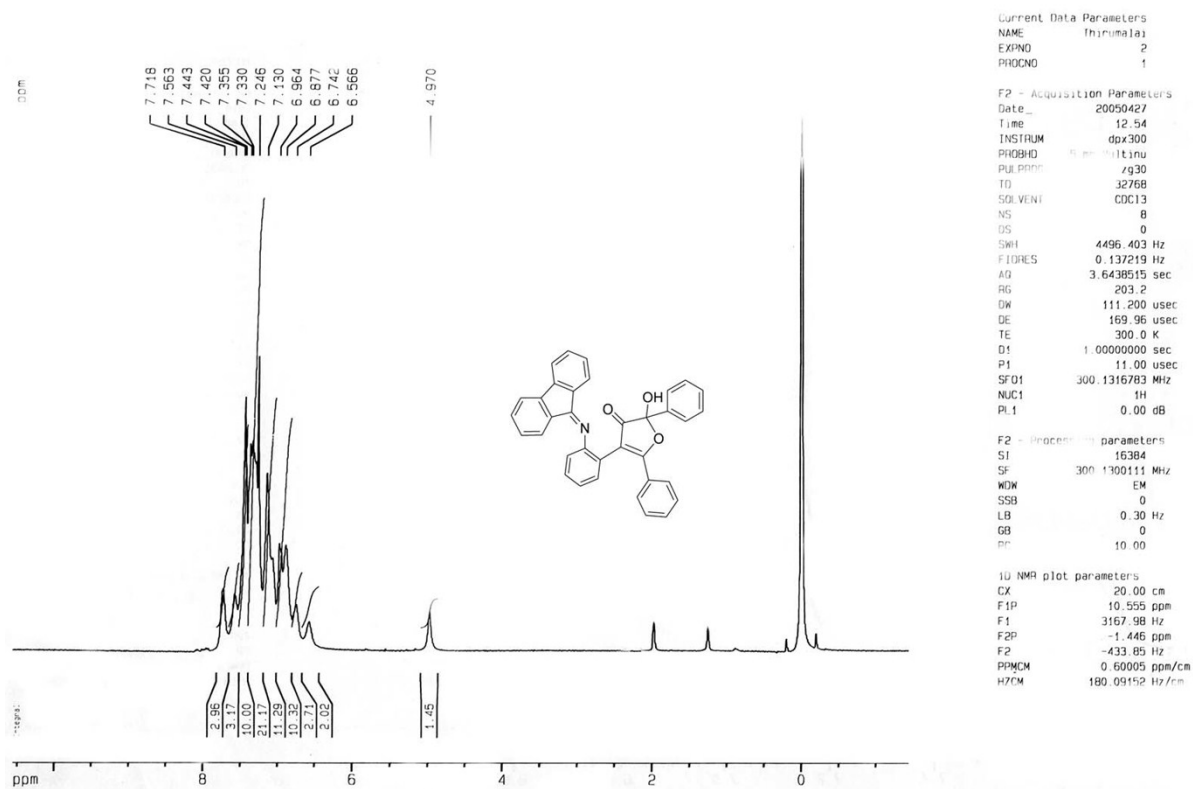

# <sup>13</sup>C NMR Spectrum of Compound 17

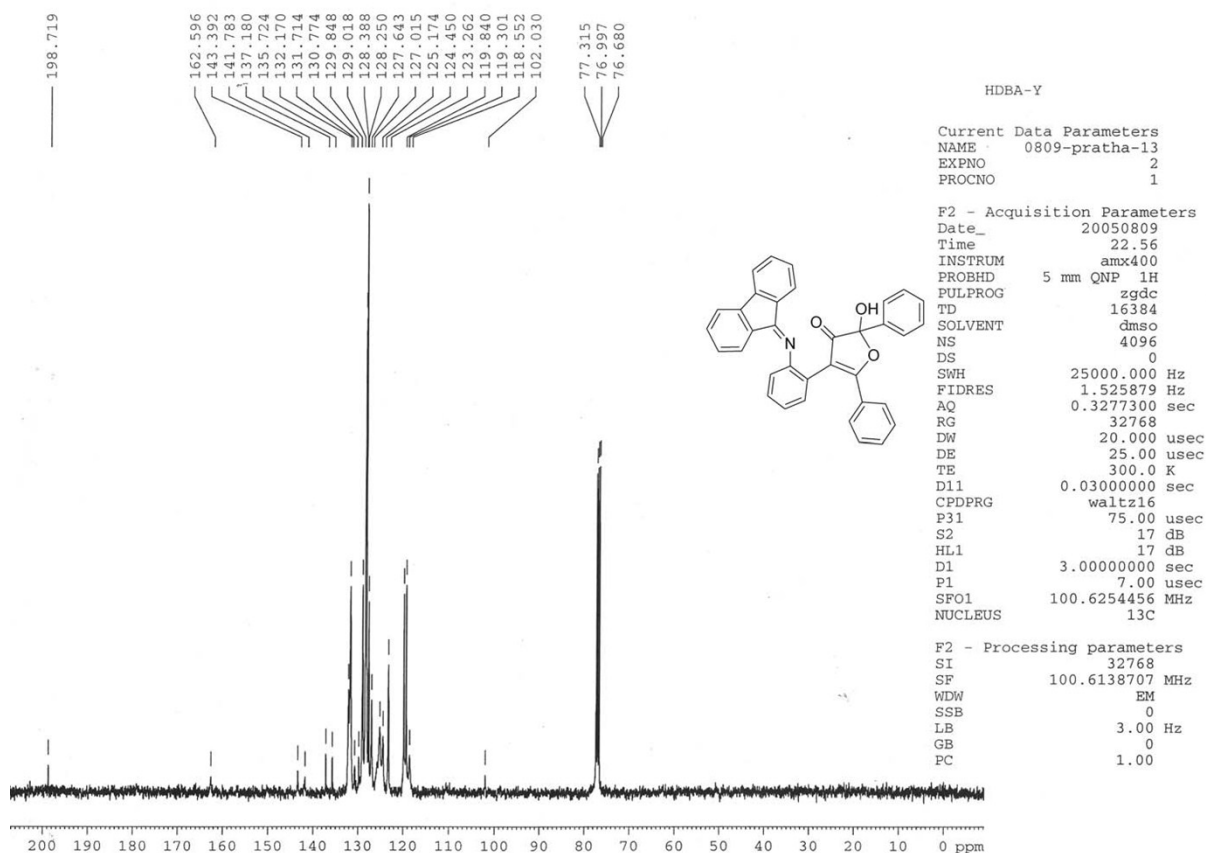

Note: Aromatic region in the NMR spectra (<sup>1</sup>H and <sup>13</sup>C) of rearranged 1:1 adducts **17**, **25** and **28** are poorly resolved. We recorded the spectra of analytically pure samples on 300, 400 and 500 MHz instruments with no improvement in resolution. Structure of adducts was assigned on the basis single crystal XRD analysis.

**2-hydroxy-2,5-diphenyl-4-(phenylamino)furan-3(2H)-one (22)**

Yield = 19%

Orange solid, mp: 150 °C

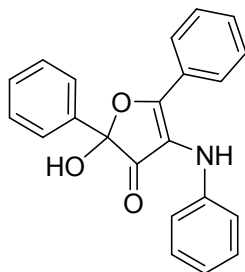

**<sup>1</sup>H NMR Spectrum of Compound 22**

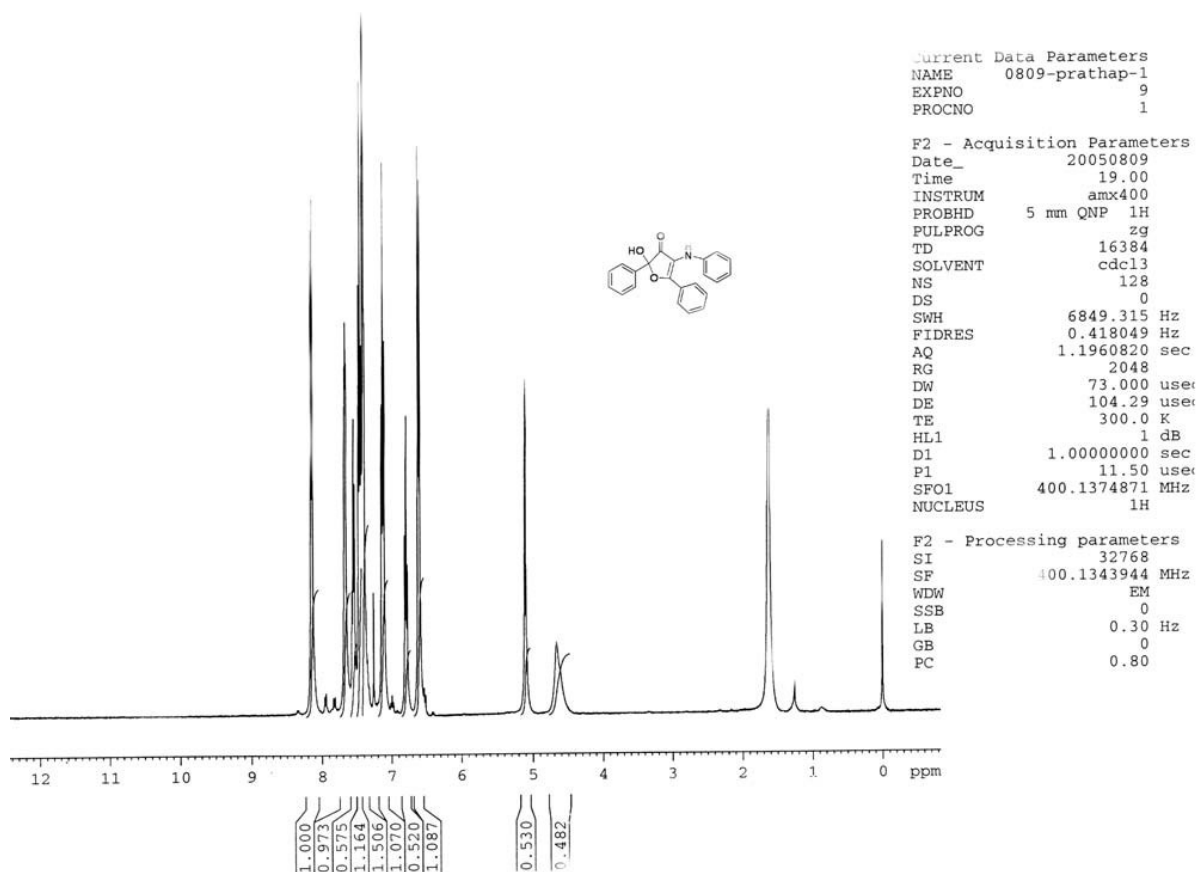

# <sup>13</sup>C NMR Spectrum of Compound 22

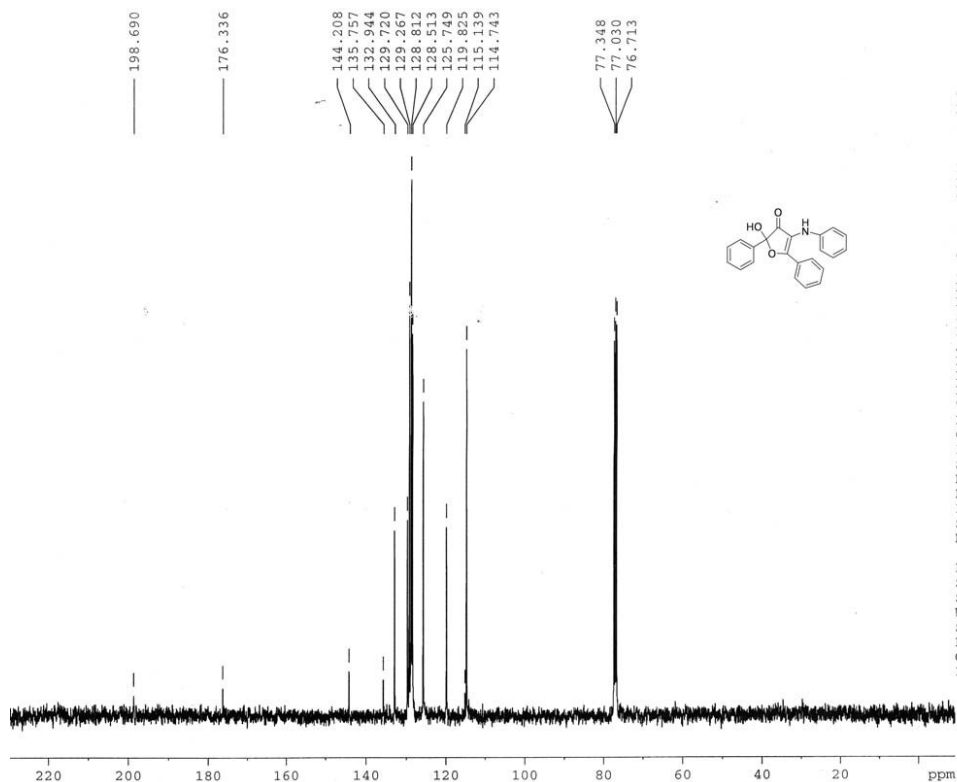

HDBA-O

Current Data Parameters  
 NAME 0810-pratha-13  
 EXPNO 6  
 PROCNO 1

F2 - Acquisition Parameters  
 Date\_ 20050810  
 Time 22.08  
 INSTRUM amx400  
 PROBHD 5 mm QNP 1H  
 PULPROG zgdc  
 TD 16384  
 SOLVENT cdcl3  
 NS 1643  
 DS 0  
 SWH 25000.000 Hz  
 FIDRES 1.525879 Hz  
 AQC 0.3277300 sec  
 RG 32768  
 DW 20.000 usec  
 DE 25.00 usec  
 TE 300.0 K  
 D11 0.03000000 sec  
 CPDPRG waltz16  
 P31 75.00 usec  
 S2 17 dB  
 HL1 17 dB  
 D1 3.00000000 sec  
 P1 7.00 usec  
 SF01 100.6254456 MHz  
 NUCLEUS 13C

F2 - Processing parameters  
 SI 32768  
 SF 100.6138668 MHz  
 WDW EM  
 SSB 0  
 LB 3.00 Hz  
 GB 0  
 PC 1.00

**4-(2-(diphenylmethyleneamino)-5-methylphenyl)-2-hydroxy-2,5-diphenylfuran-3(2H)-one (25)**

Yield = 61%

Yellow solid, mp: 134 °C

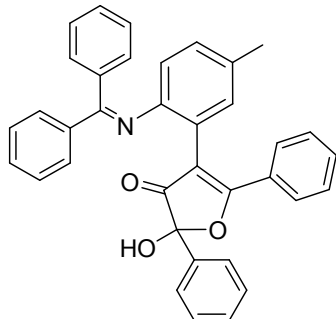

**<sup>1</sup>H NMR Spectrum of 4-(2-(diphenylmethyleneamino)-5-methylphenyl)-2-hydroxy-2,5-diphenylfuran-3(2H)-one (25)**

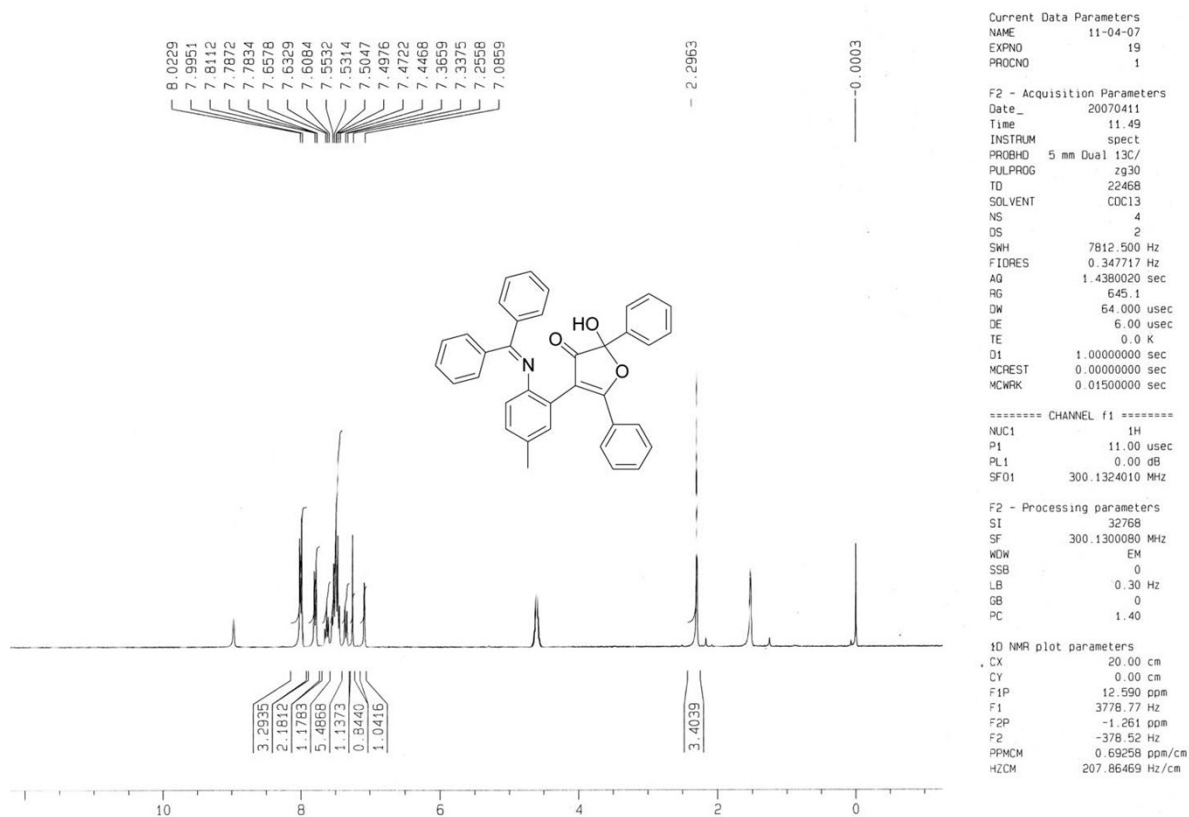

**<sup>13</sup>C NMR Spectrum of 4-(2-(diphenylmethyleneamino)-5-methylphenyl)-2-hydroxy-2,5-diphenylfuran-3(2H)-one (25)**

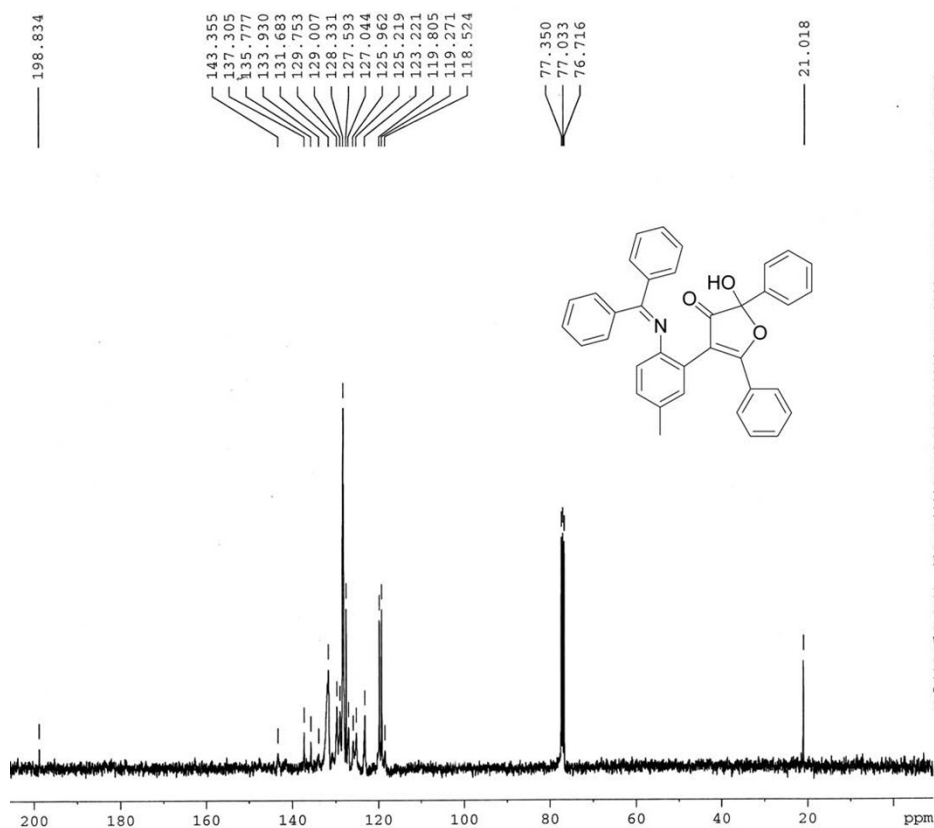

Current Data Parameters  
 NAME 0810-pratha-13  
 EXPNO 5  
 PROCNO 1

F2 - Acquisition Parameters  
 Date\_ 20050810  
 Time 20.59  
 INSTRUM amx400  
 PROBHD 5 mm QNP 1H  
 PULPROG zgdc  
 TD 16384  
 SOLVENT cdcl3  
 NS 1494  
 DS 0  
 SWH 25000.000 Hz  
 FIDRES 1.525879 Hz  
 AQ 0.3277300 sec  
 RG 32768  
 DW 20.000 usec  
 DE 25.00 usec  
 TE 300.0 K  
 D11 0.03000000 sec  
 CPDPRG waltz16  
 P31 75.00 usec  
 S2 17 dB  
 HL1 17 dB  
 D1 3.0000000 sec  
 P1 7.00 usec  
 SFO1 100.6254456 MHz  
 NUCLEUS 13C

F2 - Processing parameters  
 SI 32768  
 SF 100.6138668 MHz  
 WDW EM  
 SSB 0  
 LB 3.00 Hz  
 GB 0  
 PC 1.00

**2-hydroxy-2,5-diphenyl-4-(p-tolylamino)furan-3(2H)-one (26)**

Yield = 26%

Orange solid, mp: 154 °C

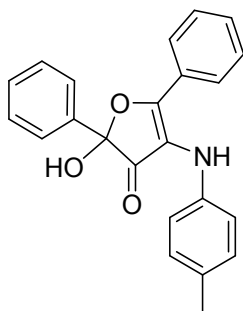

**<sup>1</sup>H NMR Spectrum of 2-hydroxy-2,5-diphenyl-4-(p-tolylamino)furan-3(2H)-one (26)**

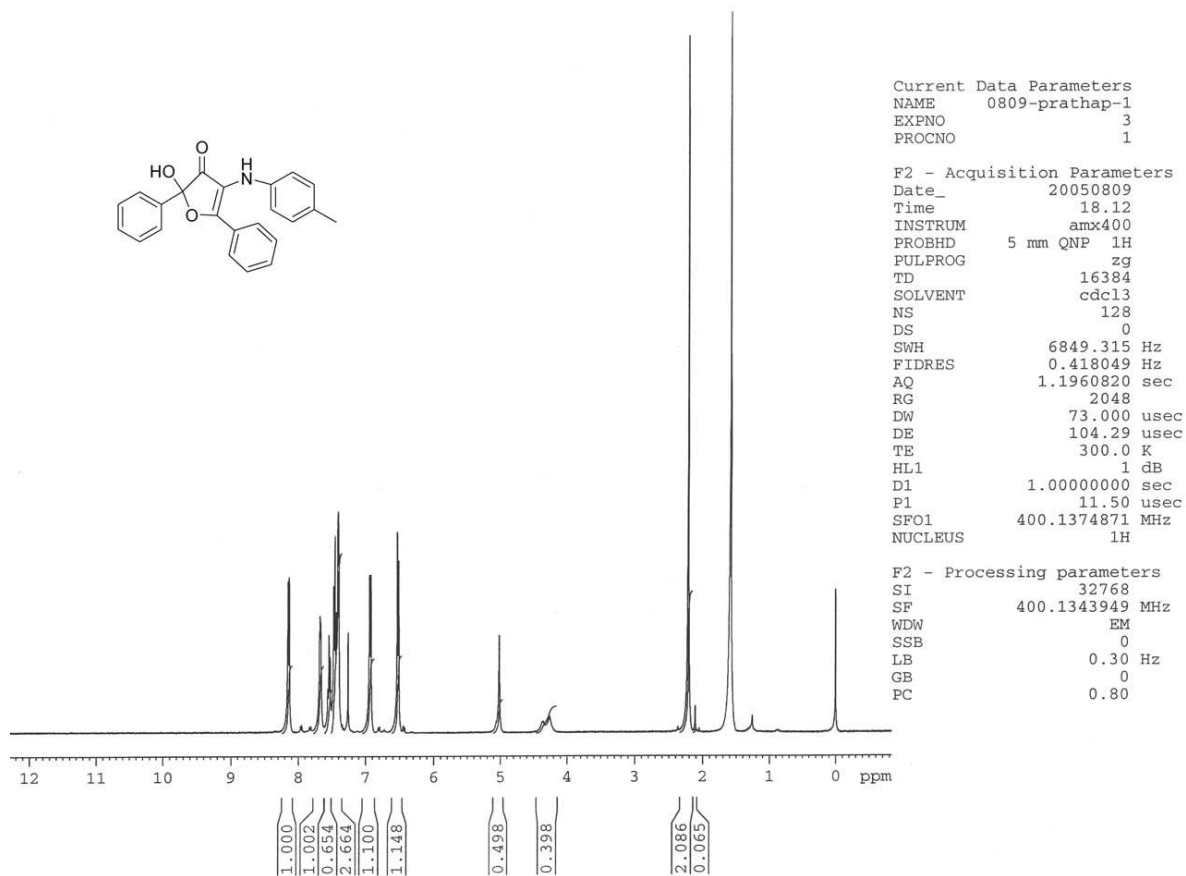

**<sup>13</sup>C NMR Spectrum of 4-(2-(diphenylmethyleneamino)-5-methylphenyl)-2-hydroxy-2,5-diphenylfuran-3(2H)-one (26)**

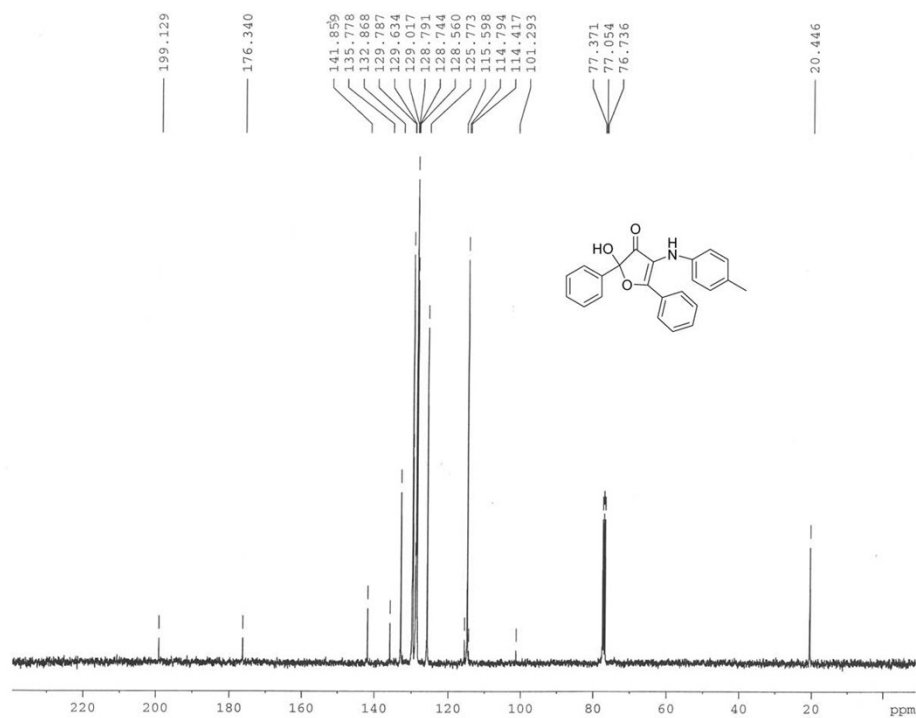

```

Current Data Parameters
NAME      0810-pratha-13
EXPNO    2
PROCNO   1

F2 - Acquisition Parameters
Date_    20050810
Time     17.37
INSTRUM  amx400
PROBHD   5 mm QNP 1H
PULPROG  zgdc
TD       16384
SOLVENT  cdcl3
NS       1815
DS       0
SWH      25000.000 Hz
FIDRES   1.525879 Hz
AQ       0.3277300 sec
RG       32768
DW       20.000 usec
DE       25.00 usec
TE       300.0 K
D11      0.03000000 sec
CPDPRG   waltz16
P31      75.00 usec
S2       17 dB
HL1      17 dB
D1       3.00000000 sec
P1       7.00 usec
SFO1    100.6254456 MHz
NUCLEUS  13C

F2 - Processing parameters
SI       32768
SF       100.6138668 MHz
WDW      EM
SSB      0
LB       3.00 Hz
GB       0
PC       1.00
    
```



**4-(1-(9H-fluoren-9-ylideneamino)naphthalen-2-yl)-2-hydroxy-2,5-diphenylfuran-3(2H)-one (28)**

Yield = 87%

Orange red solid, mp: 132 °C

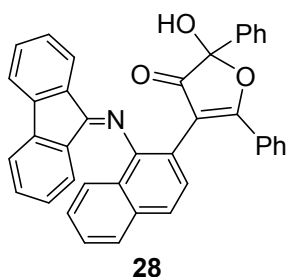

**<sup>1</sup>H NMR Spectrum of Compound 28 (full and expanded)**

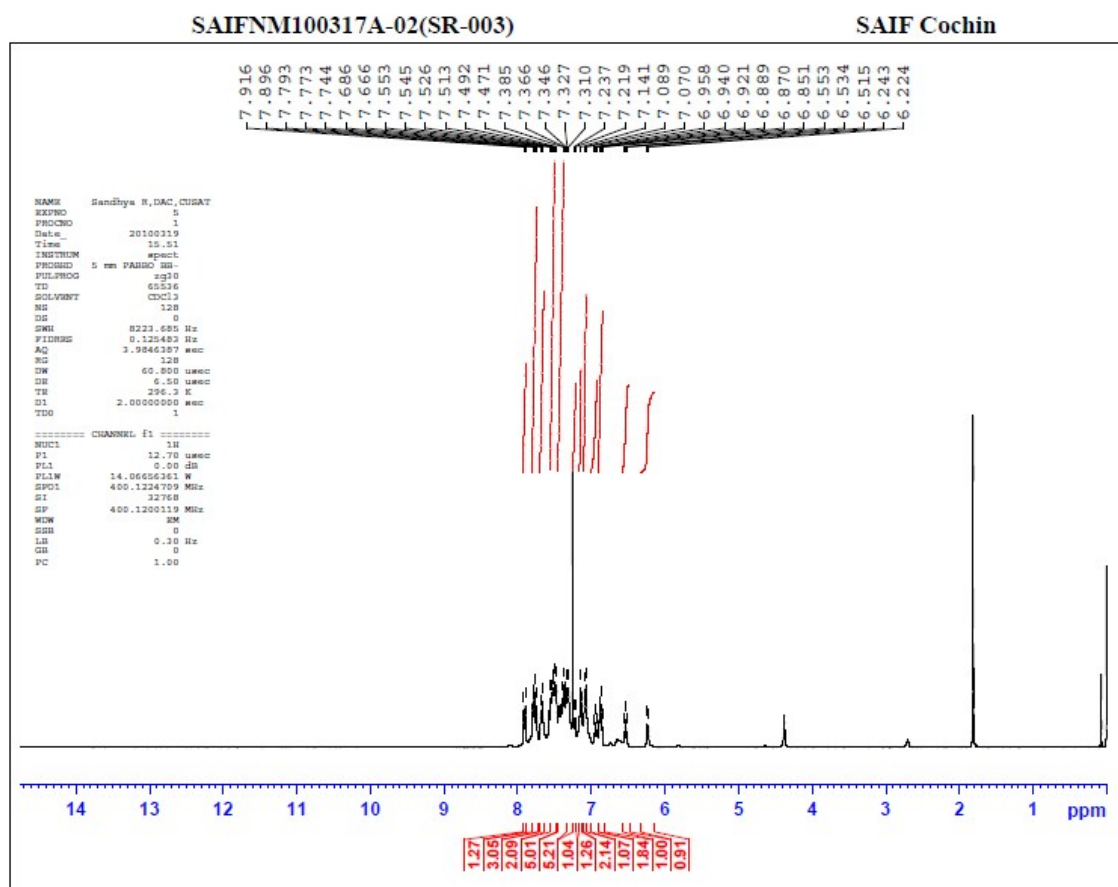

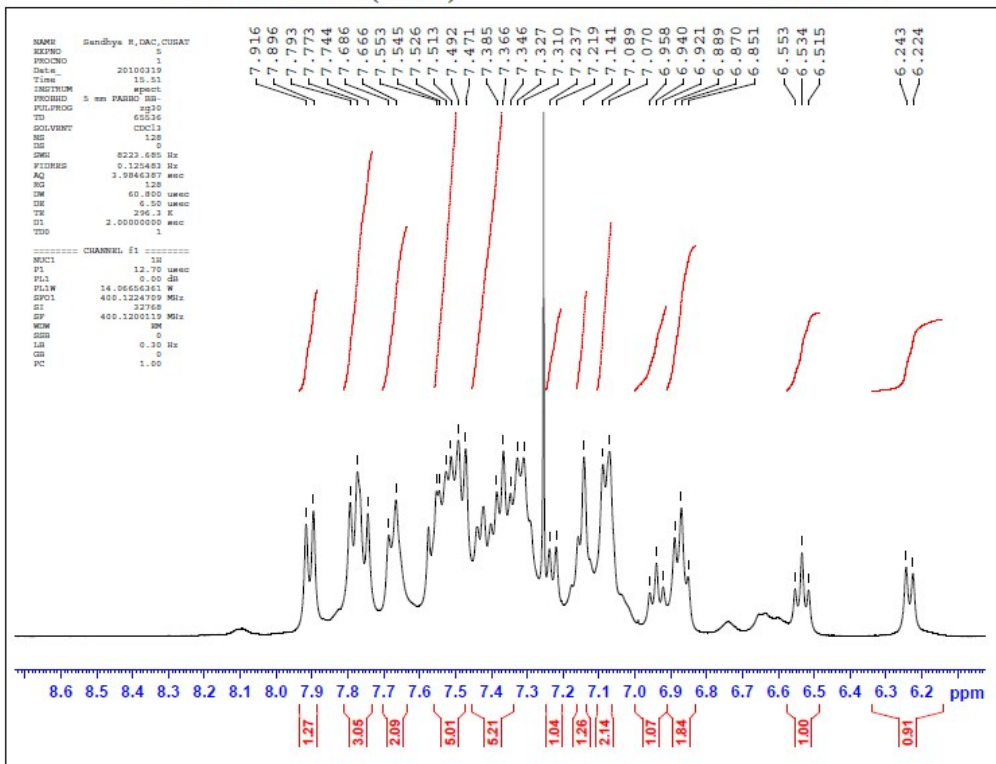

# **<sup>13</sup>C NMR Spectrum of Compound 28 (expanded and full)**

SAIFNM120125A-04(SR-035)

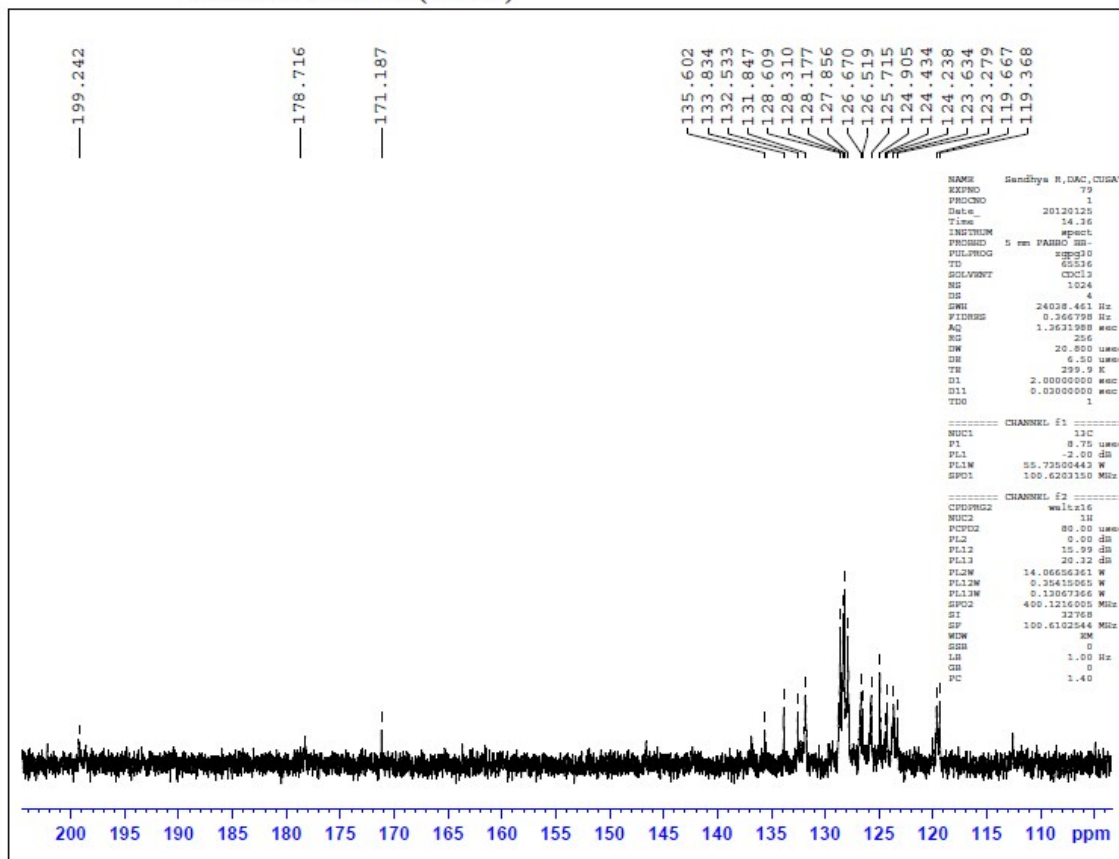

SAIFNM120125A-04(SR-035)

SAIF Cochin

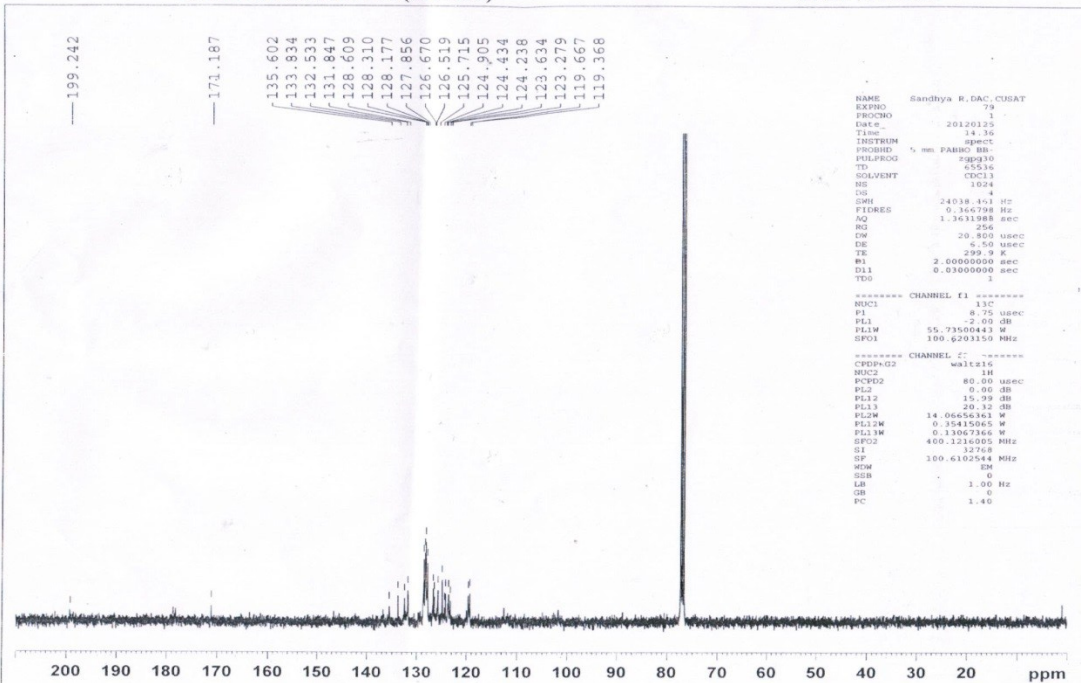

*2',5'-diphenyl-2'H-spiro[fluorene-9,3'-isoxazole]-4'-yl)(phenyl)methanone (32)*

Yield = 3%

Yellow solid, mp: 142°C

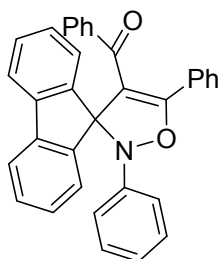

<sup>1</sup>H NMR Spectrum of Compound 32

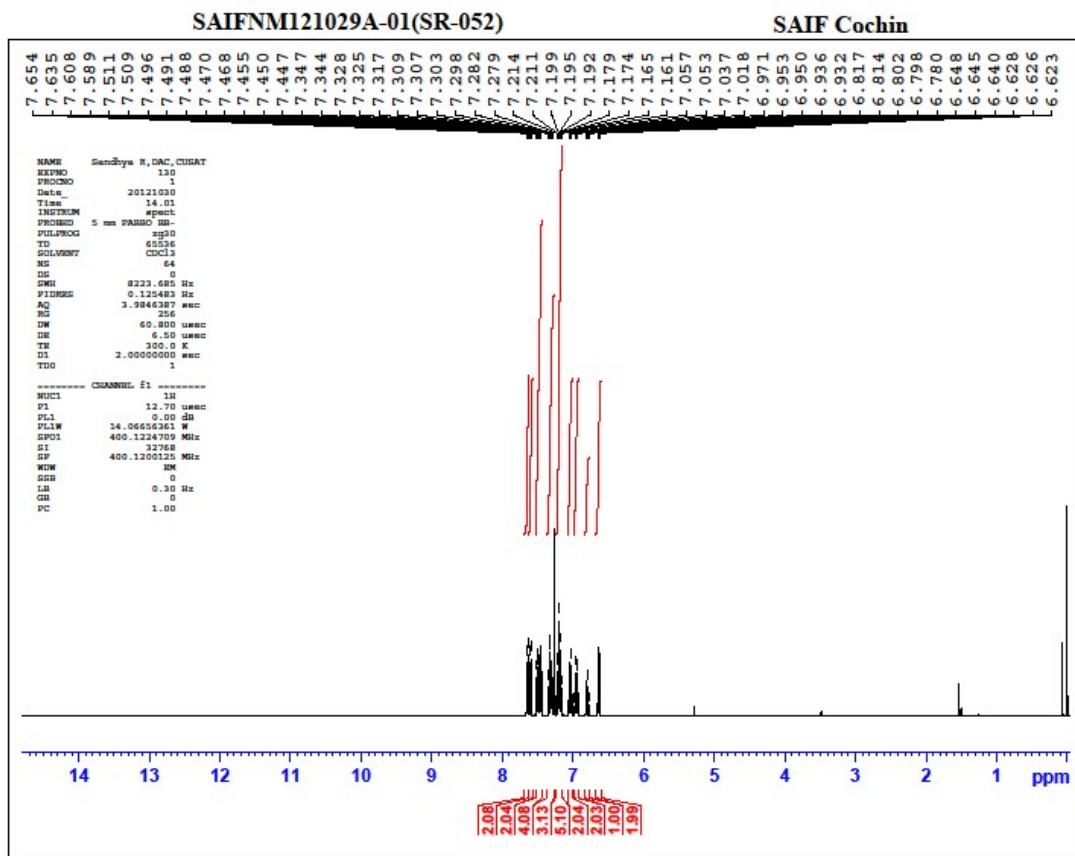

<sup>13</sup>C NMR Spectrum of Compound 32

SAIFNM121029A-02(SR-052)

SAIF Cochin

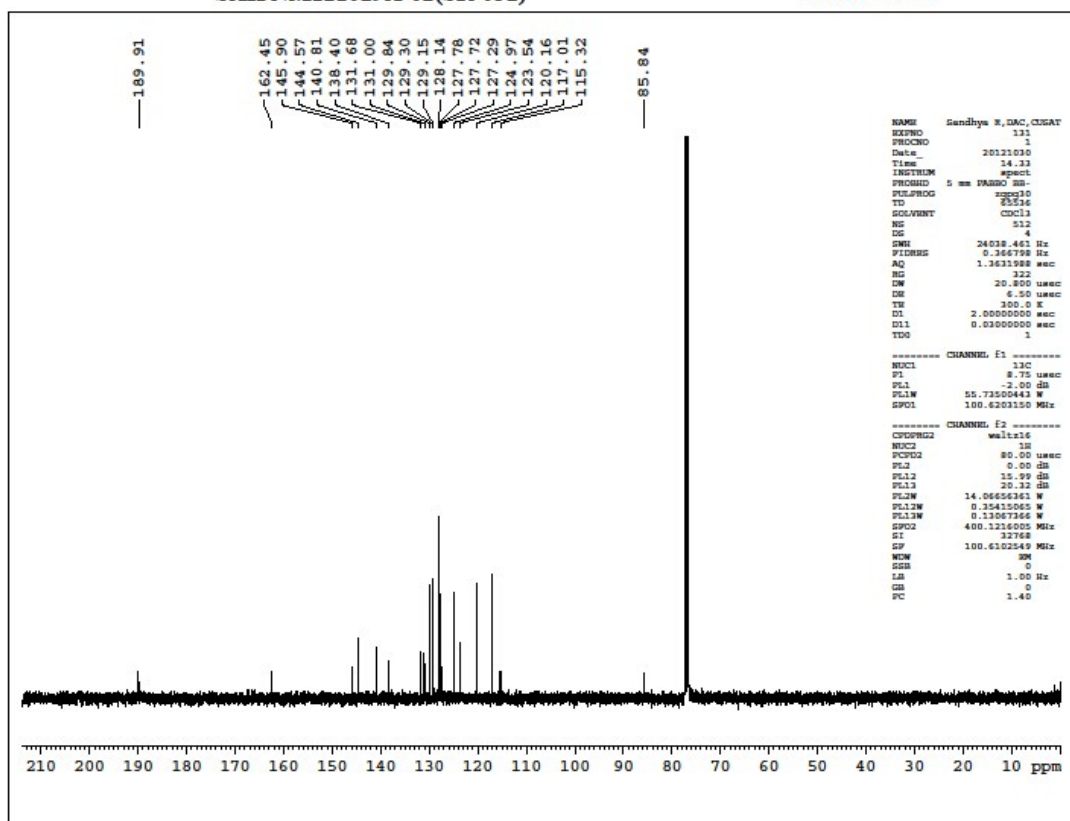

*1,3-diphenyl-2-(phenylamino)propane-1,3-dione (35)*

Yield = 16%

Yellow solid, mp: 70°C

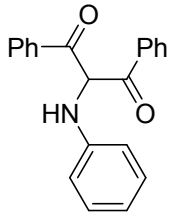

### <sup>1</sup>H NMR Spectrum of Compound 35

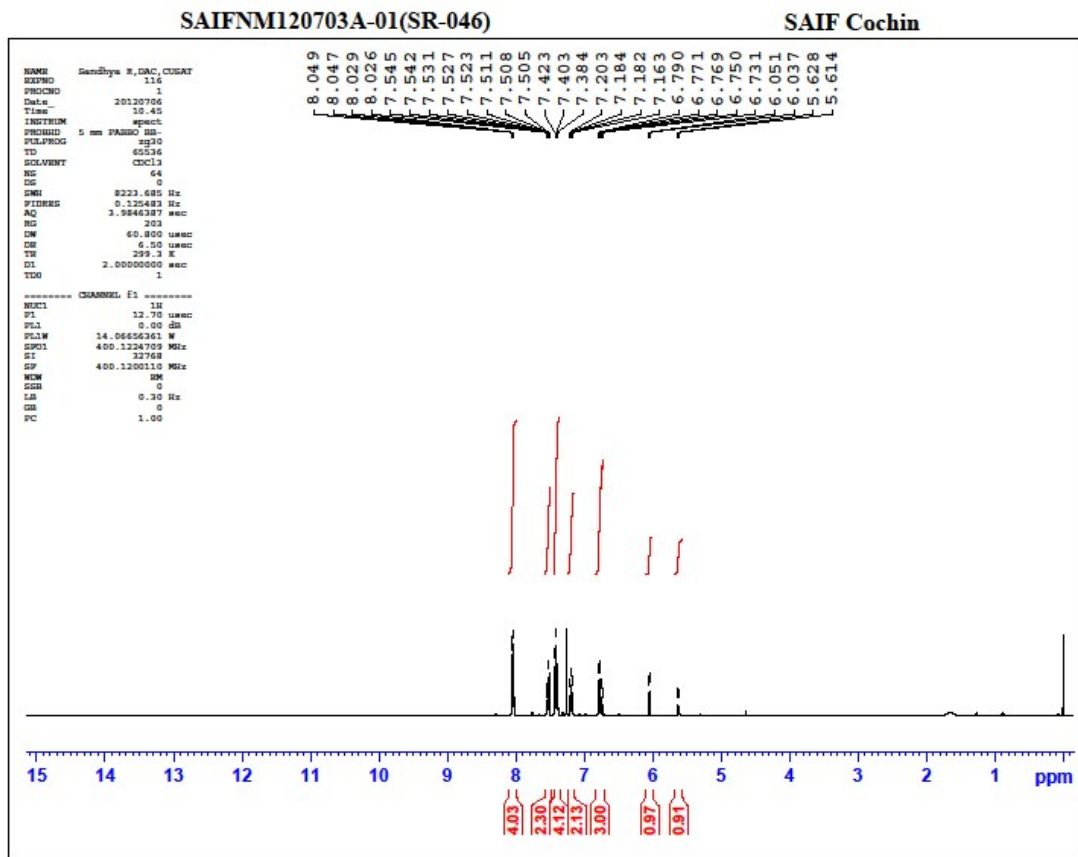

### <sup>13</sup>C NMR Spectrum of Compound 35

SAIFNM120703A-02(SR-046)

SAIF Cochin

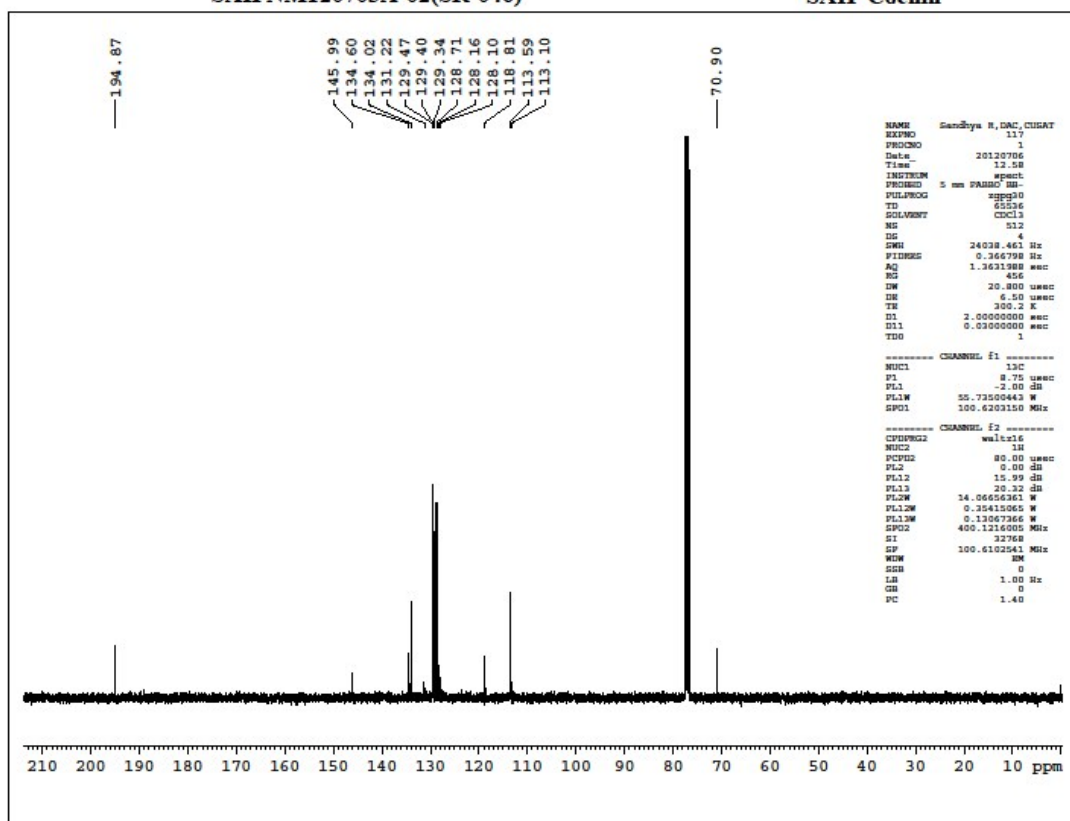

*2-(2-(9H-fluoren-9-ylideneamino)phenyl)-1,3-diphenylpropane-1,3-dione (36)*

Yield = 64%



Yellow solid, mp: 174°C

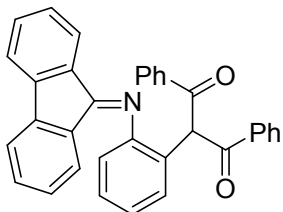

### <sup>1</sup>H NMR Spectrum of Compound 36

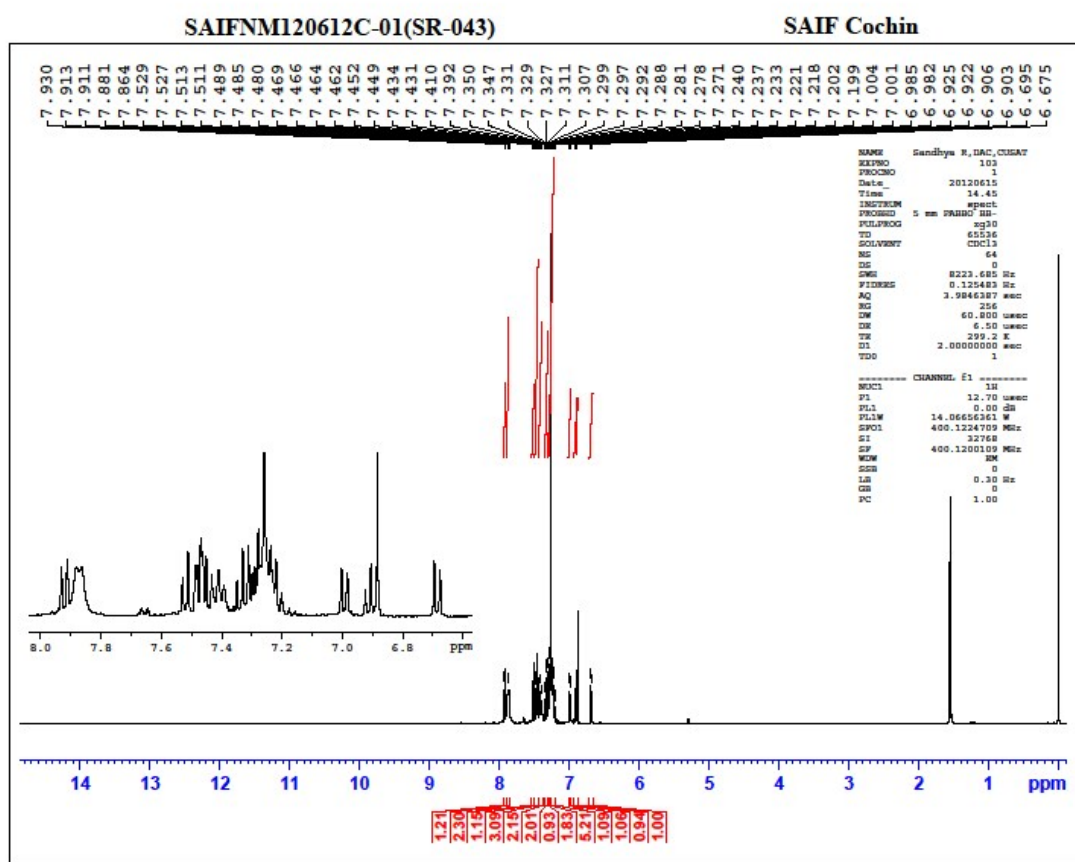

### <sup>13</sup>C NMR Spectrum of Compound 36

SAIFNMI20621A-02(SR-043)

SAIF Cochlin

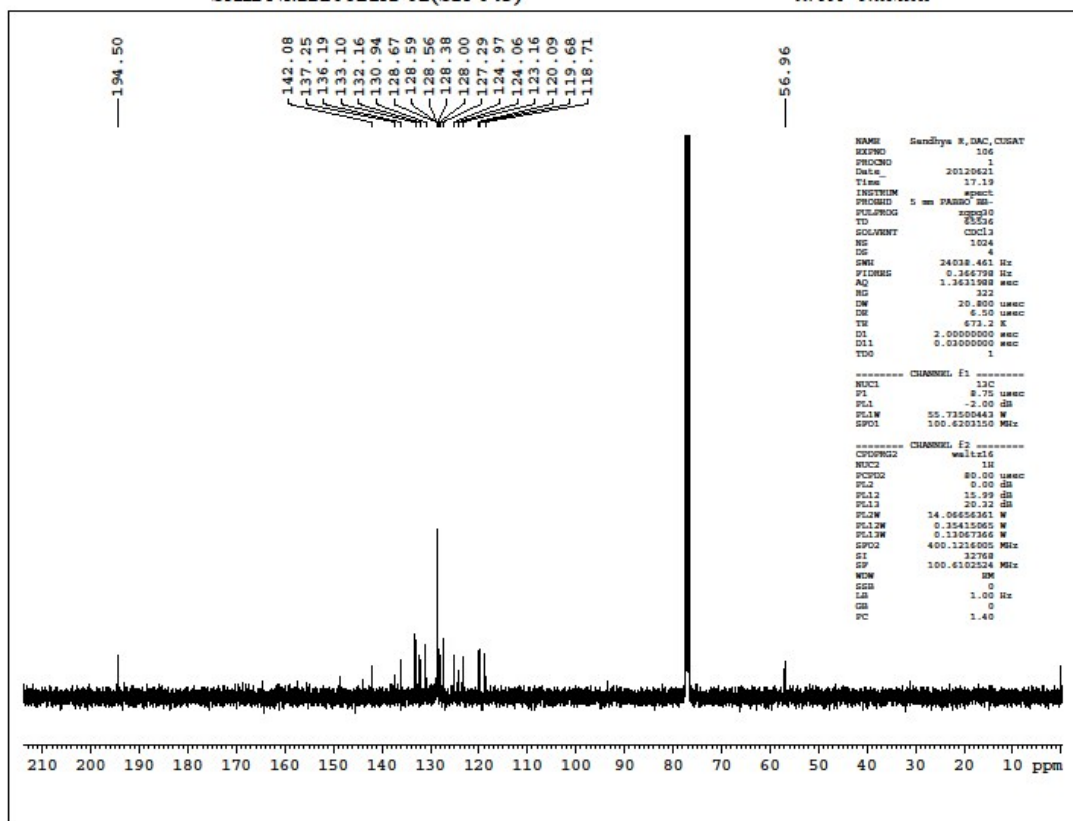

*4-(2-chlorophenylamino)-2-hydroxy-2,5-diphenylfuran-3(2H)-one (39)*

Yield = 87%

Orange solid, mp: 142 °C

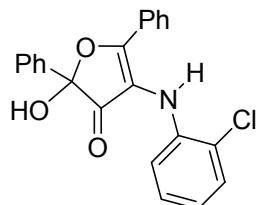

### <sup>1</sup>H NMR Spectrum of Compound 39

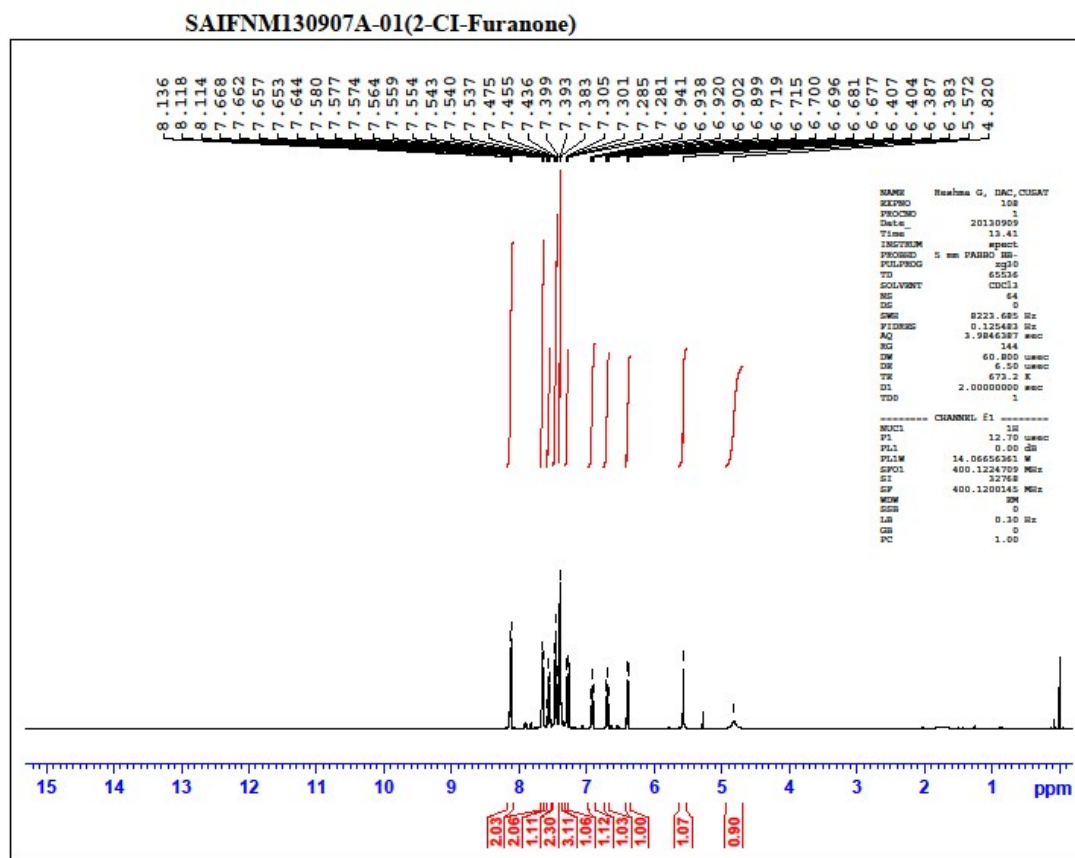

# <sup>13</sup>C NMR Spectrum of Compound 39

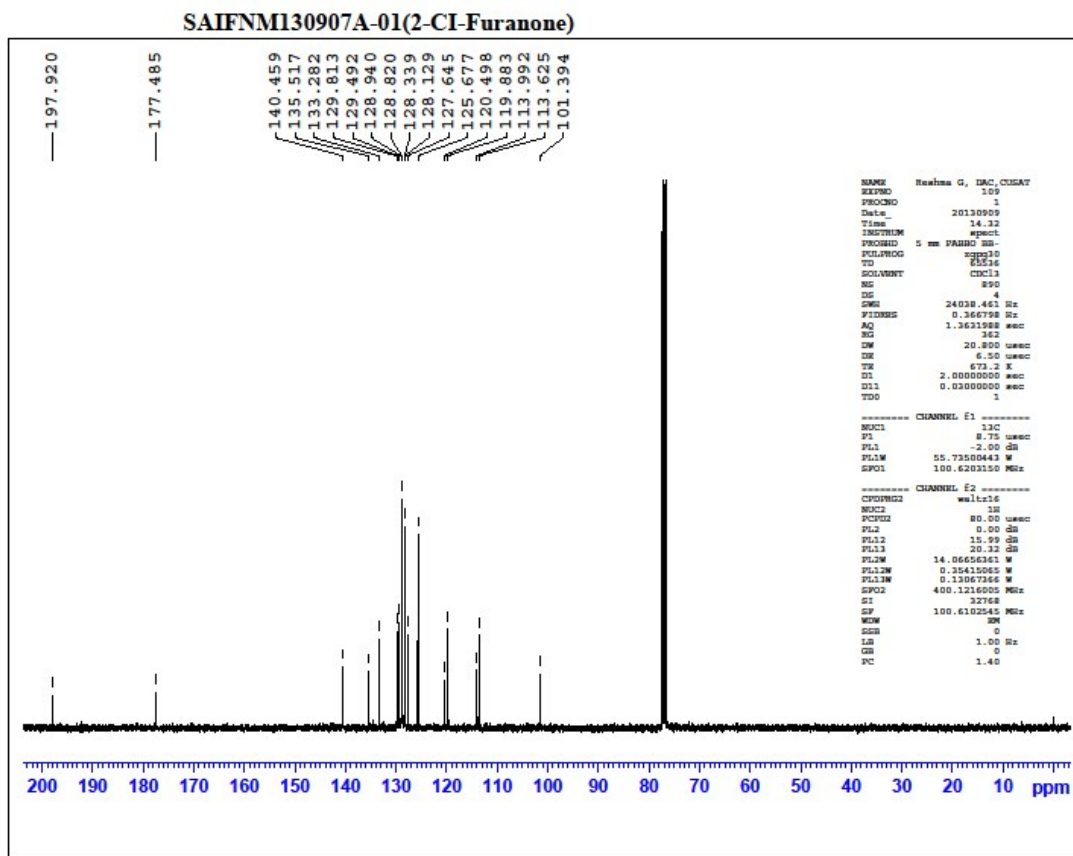

## Additional Experiment (not included in the manuscript)

### 1. Reaction between *N*-(9*H*-fluoren-9-ylidene)-2,6-difluoroaniline oxide (**C**) and DBA

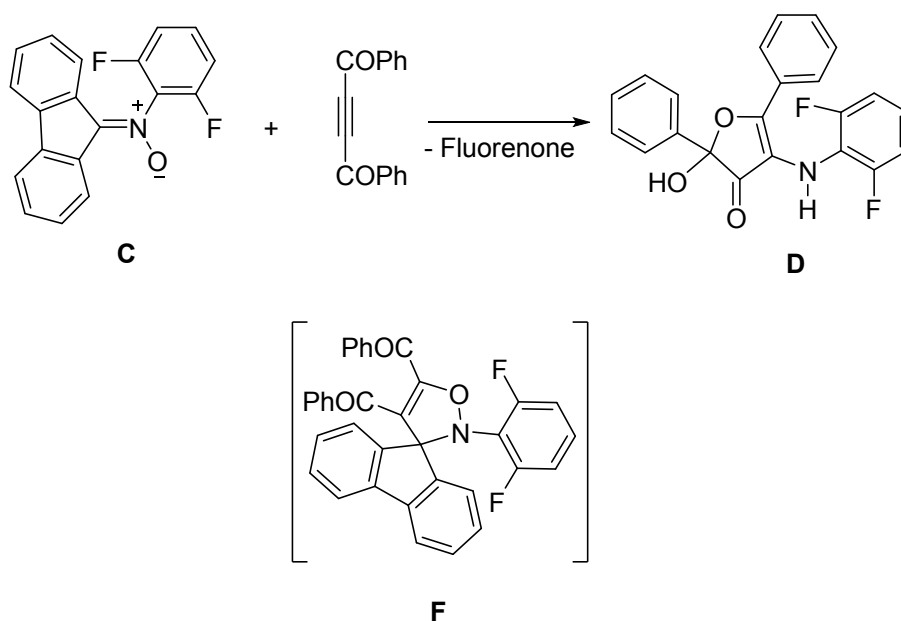

A mixture of nitrone **C** (307 mg, 1 mmol) and DBA (234 mg, 1 mmol) in 10 mL of acetonitrile was stirred at RT for 2h. Since the reaction proceeded extremely slowly, the mixture was refluxed overnight. TLC analysis indicated that substantial amount of **C** and DBA remained unchanged even after refluxing overnight. Solvent was removed under reduced pressure and the residue was chromatographed over silica gel to yield 368 mg (66%) of unchanged nitrone **C**, 53 mg (14%) of furanone **D** and 22 mg (12%) of fluorenone. In this case also, isoxazoline **F** could not be isolated in the pure form. *This experiment was conducted to establish that blocking 2,6-positions of *N*-aryl substituent on nitrone will suppress [3,3]-sigmatropic shift paving way to exclusive generation of isoxazoline derived products..*

<sup>1</sup>H NMR spectrum of 4-(2,6-difluorophenylamino)-2-hydroxy-2,5-diphenylfuran-3(2H)-one (D)

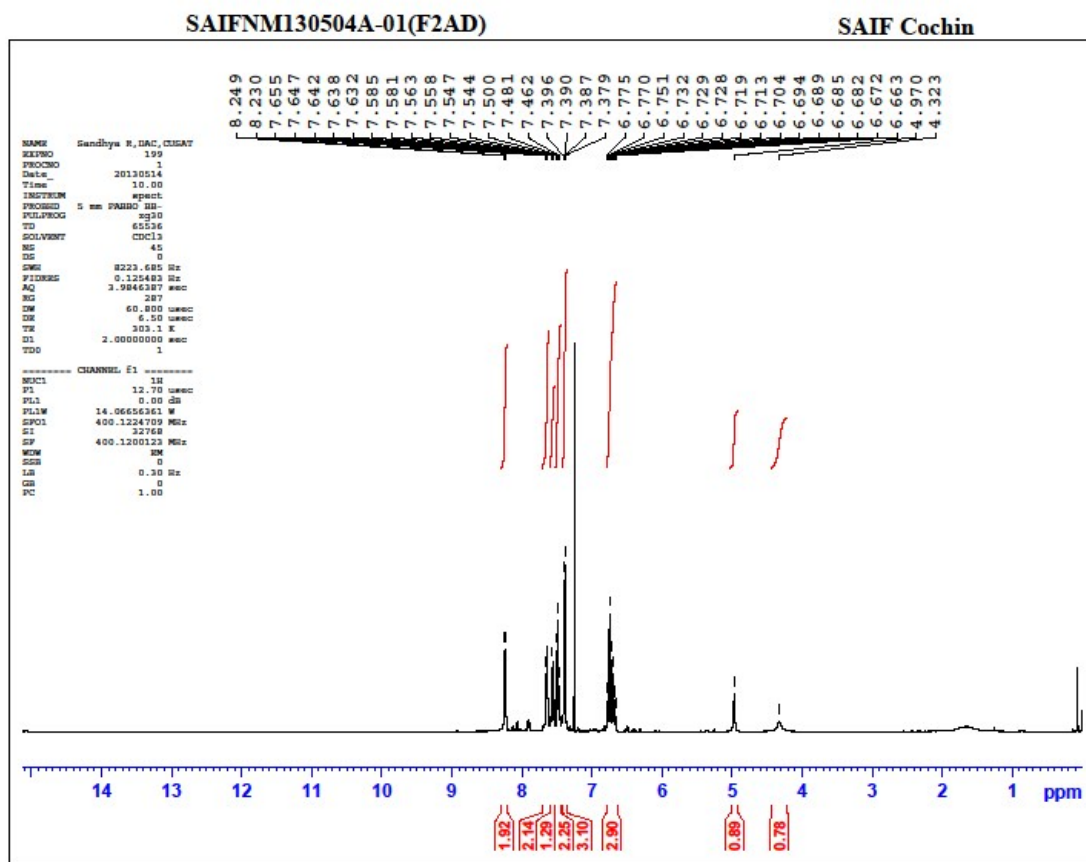

**<sup>13</sup>C NMR spectrum of 4-(2,6-difluorophenylamino)-2-hydroxy-2,5-diphenylfuran-3(2H)-one (D) (full and expanded)**

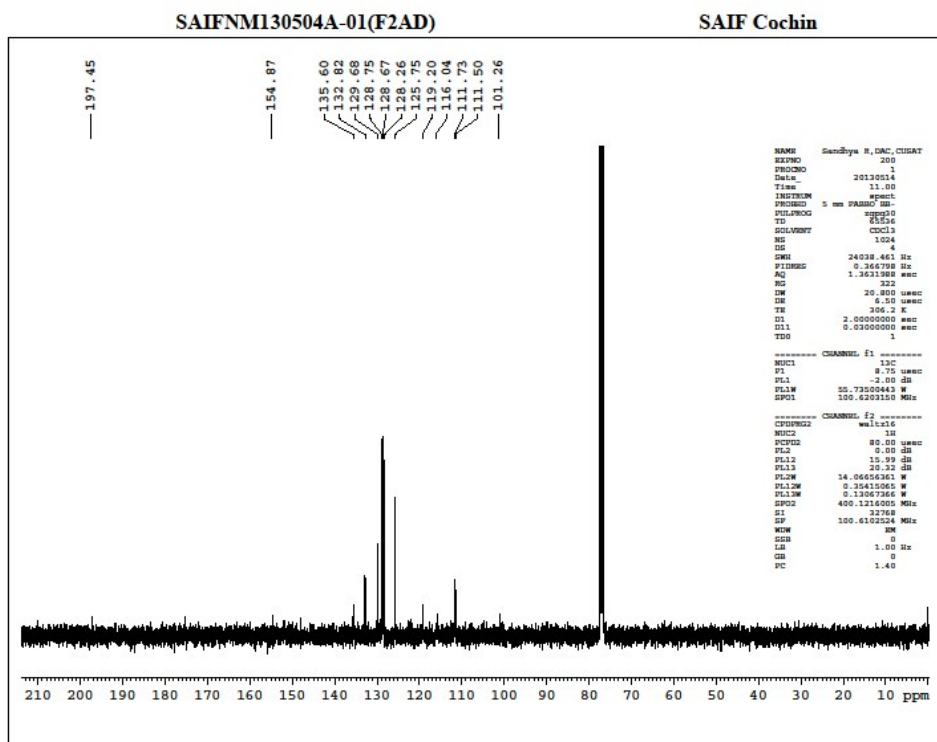

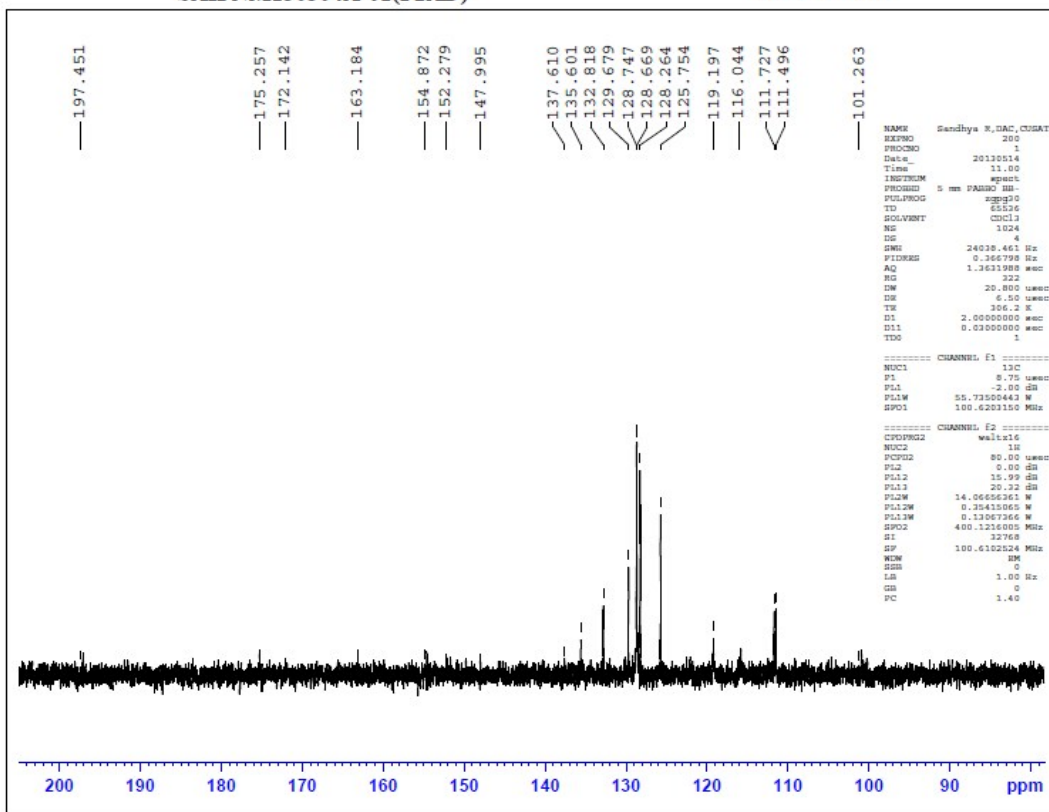

Supplement: c5nj00742a1.pdf [file c5nj00742a1.pdf]
